# Supplementary material
Source: PubMed Central journal article supplement (PMC6811403)
Supplement: AAC.00993-19-s0001.pdf [file AAC.00993-19-s0001.pdf]

## Supplemental material

### Amikacin initial dose in critically ill patients: a nonparametric approach to optimize a priori PK/PD target attainments in individual patients

Figure S1

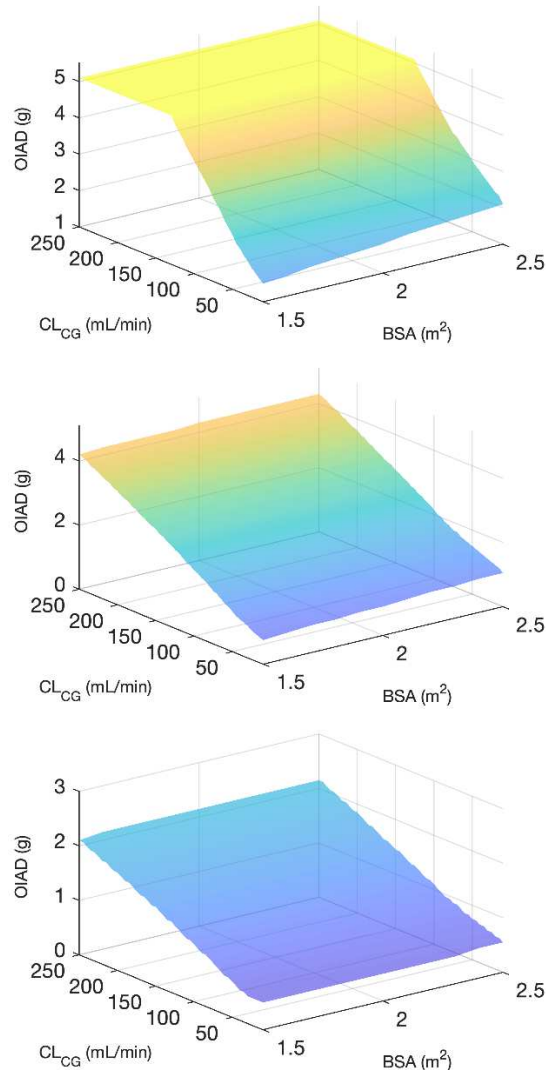

**Figure S1:** Optimal initial amikacin dose (OIAD) targeting  $AUC_{0-24h}/MIC \geq 75$  as a function of body surface area and creatinine clearance estimated by Cockcroft & Gault formula, for different MIC values.

Abbreviations: Top panel, MIC = 8 mg/L; center panel, MIC = 4 mg/L, bottom panel, MIC = 2 mg/L. BSA, Body Surface Area; CL<sub>CG</sub>, Creatinine clearance estimated by Cockcroft & Gault equation; MIC, bacterial minimal inhibitory concentration;  $AUC_{0-24h}/MIC \geq 75$ , amikacin daily area under the curve over MIC ratio  $\geq 75$ .

Note that the maximal dose was capped to 5 g.

**Table S1: Optimal initial amikacin dosing recommendations based on CLCG and BSA with associated efficacy and safety target attainment rates assuming a MIC value of 8 mg/L.**

Abbreviations : BSA, Body Surface Area; CLCG, Creatinine clearance estimated by Cockcroft & Gault equation; MIC, bacterial minimal inhibitory concentration; Cmax/MIC ≥ 8, probability of amikacin maximal plasma concentration over MIC ratio ≥ 8 , AUC/MIC ≥ 75, probability of amikacin daily area under the curve over MIC ratio ≥ 75; Cmin 24 ≤ 2.5mg/L, amikacin plasma concentration at 24h ≤ 2.5 mg/L probability; Cmin 48, amikacin plasma concentration at 48h ≤ 2.5 mg/L probability.

The maximal dose was capped to 5 g.

|               | BSA (m2)               | 1.5          |              | 1.6          |              | 1.7          |              | 1.8          |              | 1.9          |              |
|---------------|------------------------|--------------|--------------|--------------|--------------|--------------|--------------|--------------|--------------|--------------|--------------|
| CLCG (mL/min) | Targeted index         | Cmax/MIC ≥ 8 | AUC/MIC ≥ 75 |
| 10            | Optimal dose (g)       | 2.4          | 1.5          | 2.55         | 1.55         | 2.7          | 1.65         | 2.85         | 1.7          | 3            | 1.75         |
|               | Target attainment (%)  | 92.01        | 90.27        | 92.01        | 90.27        | 92.01        | 92.39        | 92.01        | 92.39        | 92.01        | 91.47        |
|               | Cmin 24 ≤ 2.5 mg/L (%) | 0            | 0            | 0            | 0            | 0            | 0            | 0            | 0            | 0            | 0            |
|               | Cmin 48 ≤ 2.5 mg/L (%) | 0            | 1.81         | 0            | 1.81         | 0            | 1.81         | 0            | 1.81         | 0            | 1.81         |
| 20            | Optimal dose (g)       | 2.45         | 1.7          | 2.6          | 1.75         | 2.75         | 1.8          | 2.9          | 1.9          | 3.05         | 1.95         |
|               | Target attainment (%)  | 92.01        | 90.27        | 92.01        | 90.27        | 92.01        | 90.27        | 92.01        | 90.27        | 92.01        | 90.27        |
|               | Cmin 24 ≤ 2.5 mg/L (%) | 1.81         | 1.81         | 1.81         | 1.81         | 0            | 1.81         | 0            | 1.81         | 0            | 1.81         |
|               | Cmin 48 ≤ 2.5 mg/L (%) | 1.81         | 1.81         | 1.81         | 1.81         | 1.81         | 1.81         | 1.81         | 1.81         | 1.81         | 1.81         |
| 30            | Optimal dose (g)       | 2.45         | 1.95         | 2.6          | 2            | 2.75         | 2.05         | 2.9          | 2.1          | 3.1          | 2.15         |
|               | Target attainment (%)  | 92.01        | 90.27        | 92.01        | 90.27        | 92.01        | 90.27        | 92.01        | 90.27        | 92.01        | 90.27        |
|               | Cmin 24 ≤ 2.5 mg/L (%) | 1.81         | 1.81         | 1.81         | 1.81         | 1.81         | 1.81         | 1.81         | 1.81         | 1.81         | 1.81         |
|               | Cmin 48 ≤ 2.5 mg/L (%) | 6.84         | 10.29        | 6.84         | 10.29        | 3.93         | 10.29        | 3.93         | 10.29        | 1.81         | 10.29        |
| 40            | Optimal dose (g)       | 2.5          | 2.2          | 2.65         | 2.25         | 2.8          | 2.3          | 2.95         | 2.35         | 3.1          | 2.4          |
|               | Target attainment (%)  | 92.01        | 92.98        | 92.01        | 92.98        | 92.01        | 90.27        | 92.01        | 90.27        | 92.01        | 90.27        |
|               | Cmin 24 ≤ 2.5 mg/L (%) | 1.81         | 1.81         | 1.81         | 1.81         | 1.81         | 1.81         | 1.81         | 1.81         | 1.81         | 1.81         |
|               | Cmin 48 ≤ 2.5 mg/L (%) | 13.31        | 18.18        | 13.31        | 17.27        | 10.29        | 13.31        | 10.29        | 13.31        | 10.29        | 13.31        |

|            |                        |       |       |       |       |       |       |       |       |       |       |
|------------|------------------------|-------|-------|-------|-------|-------|-------|-------|-------|-------|-------|
| <b>50</b>  | Optimal dose (g)       | 2.55  | 2.5   | 2.7   | 2.5   | 2.85  | 2.55  | 3     | 2.6   | 3.15  | 2.65  |
|            | Target attainment (%)  | 92.01 | 90.08 | 92.01 | 90.08 | 92.01 | 90.08 | 92.01 | 90.08 | 92.01 | 92.98 |
|            | Cmin 24 ≤ 2.5 mg/L (%) | 4.72  | 4.72  | 1.81  | 1.81  | 1.81  | 1.81  | 1.81  | 1.81  | 1.81  | 1.81  |
|            | Cmin 48 ≤ 2.5 mg/L (%) | 44.42 | 53.17 | 22.64 | 44.42 | 18.18 | 44.42 | 17.27 | 22.64 | 15.09 | 18.18 |
| <b>60</b>  | Optimal dose (g)       | 2.55  | 2.8   | 2.7   | 2.85  | 2.85  | 2.85  | 3     | 2.9   | 3.2   | 2.9   |
|            | Target attainment (%)  | 92.01 | 90.08 | 92.01 | 90.08 | 92.01 | 90.08 | 92.01 | 90.08 | 92.01 | 90.08 |
|            | Cmin 24 ≤ 2.5 mg/L (%) | 10.29 | 10.29 | 10.29 | 6.84  | 4.72  | 4.72  | 4.72  | 4.72  | 1.81  | 4.72  |
|            | Cmin 48 ≤ 2.5 mg/L (%) | 63.27 | 63.27 | 63.27 | 62.03 | 58.89 | 58.89 | 58.89 | 58.89 | 53.17 | 58.89 |
| <b>70</b>  | Optimal dose (g)       | 2.6   | 3.15  | 2.75  | 3.15  | 2.9   | 3.2   | 3.05  | 3.2   | 3.2   | 3.25  |
|            | Target attainment (%)  | 92.01 | 90.08 | 92.01 | 90.08 | 92.01 | 90.08 | 92.01 | 90.08 | 92.01 | 90.08 |
|            | Cmin 24 ≤ 2.5 mg/L (%) | 10.29 | 10.29 | 10.29 | 10.29 | 10.29 | 10.29 | 10.29 | 10.29 | 6.84  | 6.84  |
|            | Cmin 48 ≤ 2.5 mg/L (%) | 64.62 | 63.27 | 64.62 | 63.27 | 63.27 | 63.27 | 63.27 | 63.27 | 63.27 | 63.27 |
| <b>80</b>  | Optimal dose (g)       | 2.65  | 3.5   | 2.8   | 3.5   | 2.95  | 3.5   | 3.1   | 3.55  | 3.25  | 3.55  |
|            | Target attainment (%)  | 92.01 | 92.25 | 92.01 | 92.25 | 92.01 | 90.08 | 92.01 | 90.08 | 92.01 | 90.08 |
|            | Cmin 24 ≤ 2.5 mg/L (%) | 13.31 | 10.29 | 13.31 | 10.29 | 10.29 | 10.29 | 10.29 | 10.29 | 10.29 | 10.29 |
|            | Cmin 48 ≤ 2.5 mg/L (%) | 74.15 | 64.62 | 64.62 | 64.62 | 64.62 | 63.27 | 64.62 | 63.27 | 63.27 | 63.27 |
| <b>90</b>  | Optimal dose (g)       | 2.65  | 3.8   | 2.8   | 3.8   | 2.95  | 3.85  | 3.1   | 3.85  | 3.25  | 3.85  |
|            | Target attainment (%)  | 92.01 | 92.25 | 92.01 | 92.25 | 92.01 | 92.25 | 92.01 | 92.25 | 92.01 | 90.08 |
|            | Cmin 24 ≤ 2.5 mg/L (%) | 45.79 | 13.31 | 36.88 | 13.31 | 25.42 | 10.29 | 13.31 | 10.29 | 10.29 | 10.29 |
|            | Cmin 48 ≤ 2.5 mg/L (%) | 76.6  | 64.62 | 74.15 | 64.62 | 74.15 | 64.62 | 70.44 | 64.62 | 64.62 | 64.62 |
| <b>100</b> | Optimal dose (g)       | 2.7   | 4.1   | 2.85  | 4.15  | 3     | 4.15  | 3.15  | 4.15  | 3.3   | 4.2   |
|            | Target attainment (%)  | 92.01 | 92.25 | 92.01 | 92.25 | 92.01 | 92.25 | 92.01 | 92.25 | 92.01 | 92.25 |
|            | Cmin 24 ≤ 2.5 mg/L (%) | 59.22 | 15.09 | 57.95 | 13.31 | 45.79 | 13.31 | 38.28 | 13.31 | 35.09 | 10.29 |
|            | Cmin 48 ≤ 2.5 mg/L (%) | 88.69 | 73.16 | 80.49 | 67.34 | 76.68 | 64.62 | 74.15 | 64.62 | 74.15 | 64.62 |
| <b>110</b> | Optimal dose (g)       | 2.75  | 4.4   | 2.9   | 4.45  | 3.05  | 4.45  | 3.2   | 4.45  | 3.35  | 4.5   |
|            | Target attainment (%)  | 92.01 | 92.25 | 92.01 | 92.25 | 92.01 | 92.25 | 92.01 | 92.25 | 92.01 | 92.25 |
|            | Cmin 24 ≤ 2.5 mg/L (%) | 63.27 | 36.88 | 63.27 | 36.88 | 57.95 | 35.09 | 50.33 | 25.42 | 45.79 | 13.31 |

|            |                        |       |       |       |       |       |       |       |       |       |       |
|------------|------------------------|-------|-------|-------|-------|-------|-------|-------|-------|-------|-------|
|            | Cmin 48 ≤ 2.5 mg/L (%) | 92.99 | 74.15 | 88.69 | 74.15 | 87.77 | 74.15 | 80.49 | 74.15 | 78.04 | 70.44 |
| <b>120</b> | Optimal dose (g)       | 2.75  | 4.75  | 2.9   | 4.75  | 3.05  | 4.75  | 3.2   | 4.8   | 3.35  | 4.8   |
|            | Target attainment (%)  | 92.01 | 92.25 | 92.01 | 92.25 | 92.01 | 92.25 | 92.01 | 92.25 | 92.01 | 92.25 |
|            | Cmin 24 ≤ 2.5 mg/L (%) | 63.27 | 53.51 | 63.27 | 48.06 | 63.27 | 42.6  | 61.09 | 36.88 | 57.95 | 35.09 |
|            | Cmin 48 ≤ 2.5 mg/L (%) | 92.99 | 76.6  | 92.99 | 74.15 | 92.99 | 74.15 | 88.69 | 74.15 | 87.77 | 74.15 |
| <b>130</b> | Optimal dose (g)       | 2.8   | > 5   | 2.95  | > 5   | 3.1   | > 5   | 3.25  | > 5   | 3.4   | > 5   |
|            | Target attainment (%)  | 92.01 | 88.8  | 92.01 | 88.8  | 92.01 | 88.8  | 92.01 | 88.8  | 92.01 | 88.8  |
|            | Cmin 24 ≤ 2.5 mg/L (%) | 64.62 | 60.13 | 63.27 | 56.71 | 63.27 | 56.71 | 63.27 | 49.08 | 62.36 | 45.79 |
|            | Cmin 48 ≤ 2.5 mg/L (%) | 92.99 | 79.14 | 92.99 | 79.14 | 92.99 | 79.14 | 92.99 | 74.15 | 92.99 | 74.15 |
| <b>140</b> | Optimal dose (g)       | 2.8   | > 5   | 2.95  | > 5   | 3.1   | > 5   | 3.25  | > 5   | 3.45  | > 5   |
|            | Target attainment (%)  | 92.01 | 86.63 | 92.01 | 86.63 | 92.01 | 86.63 | 92.01 | 86.63 | 92.01 | 86.63 |
|            | Cmin 24 ≤ 2.5 mg/L (%) | 70.44 | 60.13 | 64.62 | 60.13 | 64.62 | 59.22 | 63.27 | 57.95 | 63.27 | 57.95 |
|            | Cmin 48 ≤ 2.5 mg/L (%) | 92.99 | 88.69 | 92.99 | 88.69 | 92.99 | 80.49 | 92.99 | 80.49 | 92.99 | 80.49 |
| <b>150</b> | Optimal dose (g)       | 2.85  | > 5   | 3     | > 5   | 3.15  | > 5   | 3.3   | > 5   | 3.45  | > 5   |
|            | Target attainment (%)  | 92.01 | 86.63 | 92.01 | 86.63 | 92.01 | 86.63 | 92.01 | 86.63 | 92.01 | 86.63 |
|            | Cmin 24 ≤ 2.5 mg/L (%) | 70.44 | 63.27 | 70.44 | 63.27 | 70.44 | 63.27 | 64.62 | 59.22 | 64.62 | 59.22 |
|            | Cmin 48 ≤ 2.5 mg/L (%) | 94.47 | 88.69 | 92.99 | 88.69 | 92.99 | 88.69 | 92.99 | 88.69 | 92.99 | 87.77 |
| <b>160</b> | Optimal dose (g)       | 2.9   | > 5   | 3.05  | > 5   | 3.2   | > 5   | 3.35  | > 5   | 3.5   | > 5   |
|            | Target attainment (%)  | 93.28 | 80.55 | 92.01 | 80.55 | 92.01 | 80.55 | 92.01 | 80.55 | 92.01 | 80.55 |
|            | Cmin 24 ≤ 2.5 mg/L (%) | 71.44 | 63.27 | 70.44 | 63.27 | 70.44 | 63.27 | 70.44 | 63.27 | 64.62 | 63.27 |
|            | Cmin 48 ≤ 2.5 mg/L (%) | 94.47 | 92.99 | 94.47 | 92.99 | 94.47 | 92.99 | 92.99 | 92.99 | 92.99 | 92.99 |
| <b>170</b> | Optimal dose (g)       | 2.9   | > 5   | 3.05  | > 5   | 3.2   | > 5   | 3.35  | > 5   | 3.5   | > 5   |
|            | Target attainment (%)  | 92.01 | 80.55 | 92.01 | 80.55 | 92.01 | 80.55 | 92.01 | 80.55 | 92.01 | 80.55 |
|            | Cmin 24 ≤ 2.5 mg/L (%) | 78.44 | 63.27 | 71.44 | 63.27 | 70.44 | 63.27 | 70.44 | 63.27 | 70.44 | 63.27 |
|            | Cmin 48 ≤ 2.5 mg/L (%) | 94.47 | 92.99 | 94.47 | 92.99 | 94.47 | 92.99 | 94.47 | 92.99 | 92.99 | 92.99 |
| <b>180</b> | Optimal dose (g)       | 2.95  | > 5   | 3.1   | > 5   | 3.25  | > 5   | 3.4   | > 5   | 3.55  | > 5   |
|            | Target attainment (%)  | 93.28 | 80.55 | 93.28 | 80.55 | 92.01 | 80.55 | 92.01 | 80.55 | 92.01 | 80.55 |

|            |                        |       |       |       |       |       |       |       |       |       |       |
|------------|------------------------|-------|-------|-------|-------|-------|-------|-------|-------|-------|-------|
|            | Cmin 24 ≤ 2.5 mg/L (%) | 80.97 | 70.44 | 78.44 | 70.44 | 71.44 | 64.62 | 70.44 | 63.27 | 70.44 | 63.27 |
|            | Cmin 48 ≤ 2.5 mg/L (%) | 96.83 | 92.99 | 94.47 | 92.99 | 94.47 | 92.99 | 94.47 | 92.99 | 94.47 | 92.99 |
| <b>190</b> | Optimal dose (g)       | 3     | > 5   | 3.15  | > 5   | 3.3   | > 5   | 3.45  | > 5   | 3.6   | > 5   |
|            | Target attainment (%)  | 91.47 | 80.55 | 93.28 | 80.55 | 93.28 | 80.55 | 93.28 | 80.55 | 92.01 | 80.55 |
|            | Cmin 24 ≤ 2.5 mg/L (%) | 85.32 | 70.44 | 78.44 | 70.44 | 78.44 | 70.44 | 77.08 | 70.44 | 70.44 | 64.62 |
|            | Cmin 48 ≤ 2.5 mg/L (%) | 96.83 | 92.99 | 96.83 | 92.99 | 94.47 | 92.99 | 94.47 | 92.99 | 94.47 | 92.99 |
| <b>200</b> | Optimal dose (g)       | 3     | > 5   | 3.15  | > 5   | 3.3   | > 5   | 3.45  | > 5   | 3.6   | > 5   |
|            | Target attainment (%)  | 91.47 | 80.55 | 91.47 | 80.55 | 93.28 | 80.55 | 92.01 | 80.55 | 92.01 | 80.55 |
|            | Cmin 24 ≤ 2.5 mg/L (%) | 92.07 | 71.44 | 83.68 | 71.44 | 78.44 | 70.44 | 78.44 | 70.44 | 77.08 | 70.44 |
|            | Cmin 48 ≤ 2.5 mg/L (%) | 96.83 | 94.47 | 96.83 | 94.47 | 96.83 | 92.99 | 94.47 | 92.99 | 94.47 | 92.99 |
| <b>210</b> | Optimal dose (g)       | 3.05  | > 5   | 3.2   | > 5   | 3.35  | > 5   | 3.5   | > 5   | 3.65  | > 5   |
|            | Target attainment (%)  | 91.47 | 100   | 91.47 | 100   | 93.28 | 100   | 93.28 | 72.39 | 93.28 | 69.1  |
|            | Cmin 24 ≤ 2.5 mg/L (%) | 92.07 | 72.79 | 92.07 | 71.44 | 83.68 | 71.44 | 78.44 | 70.44 | 78.44 | 70.44 |
|            | Cmin 48 ≤ 2.5 mg/L (%) | 96.83 | 94.47 | 96.83 | 94.47 | 96.83 | 94.47 | 96.83 | 94.47 | 94.47 | 92.99 |
| <b>220</b> | Optimal dose (g)       | 3.1   | > 5   | 3.2   | > 5   | 3.35  | > 5   | 3.5   | > 5   | 3.65  | > 5   |
|            | Target attainment (%)  | 91.47 | 59.42 | 91.47 | 59.42 | 91.47 | 59.42 | 93.28 | 59.42 | 92.01 | 59.42 |
|            | Cmin 24 ≤ 2.5 mg/L (%) | 92.07 | 77.01 | 92.07 | 74.47 | 89.62 | 72.79 | 80.97 | 71.44 | 78.44 | 71.44 |
|            | Cmin 48 ≤ 2.5 mg/L (%) | 96.83 | 94.47 | 96.83 | 94.47 | 96.83 | 94.47 | 96.83 | 94.47 | 96.83 | 94.47 |
| <b>230</b> | Optimal dose (g)       | 3.1   | > 5   | 3.25  | > 5   | 3.4   | > 5   | 3.55  | > 5   | 3.7   | > 5   |
|            | Target attainment (%)  | 91.47 | 41.59 | 91.47 | 41.59 | 91.47 | 41.59 | 91.47 | 41.59 | 93.28 | 41.59 |
|            | Cmin 24 ≤ 2.5 mg/L (%) | 92.07 | 83.68 | 92.07 | 80.97 | 92.07 | 78.44 | 89.62 | 78.44 | 80.97 | 73.12 |
|            | Cmin 48 ≤ 2.5 mg/L (%) | 96.83 | 96.83 | 96.83 | 94.47 | 96.83 | 94.47 | 96.83 | 94.47 | 96.83 | 94.47 |
| <b>240</b> | Optimal dose (g)       | 3.15  | > 5   | 3.3   | > 5   | 3.45  | > 5   | 3.6   | > 5   | 3.75  | > 5   |
|            | Target attainment (%)  | 91.47 | 41.59 | 91.47 | 41.59 | 91.47 | 41.59 | 91.47 | 41.59 | 93.28 | 41.59 |
|            | Cmin 24 ≤ 2.5 mg/L (%) | 92.99 | 87.77 | 92.07 | 83.68 | 92.07 | 80.97 | 92.07 | 78.44 | 87.99 | 78.44 |
|            | Cmin 48 ≤ 2.5 mg/L (%) | 96.83 | 96.83 | 96.83 | 96.83 | 96.83 | 94.47 | 96.83 | 94.47 | 96.83 | 94.47 |
| <b>250</b> | Optimal dose (g)       | 3.2   | > 5   | 3.3   | > 5   | 3.45  | > 5   | 3.6   | > 5   | 3.75  | > 5   |

|                        |       |       |       |       |       |       |       |       |       |       |
|------------------------|-------|-------|-------|-------|-------|-------|-------|-------|-------|-------|
| Target attainment (%)  | 92.39 | 41.59 | 91.47 | 41.59 | 91.47 | 41.59 | 91.47 | 41.59 | 91.47 | 41.59 |
| Cmin 24 ≤ 2.5 mg/L (%) | 92.99 | 92.07 | 92.99 | 92.07 | 92.07 | 83.68 | 92.07 | 80.97 | 89.62 | 78.44 |
| Cmin 48 ≤ 2.5 mg/L (%) | 96.83 | 96.83 | 96.83 | 96.83 | 96.83 | 96.83 | 96.83 | 96.83 | 96.83 | 94.47 |

**Table S1 continued**

| CLCG<br>(mL/min) | BSA (m <sup>2</sup> )<br>Targeted index | <b>2</b>        |                 | <b>2.1</b>      |                 | <b>2.2</b>      |                 | <b>2.3</b>      |                 | <b>2.4</b>      |                 | <b>2.5</b>      |                 |
|------------------|-----------------------------------------|-----------------|-----------------|-----------------|-----------------|-----------------|-----------------|-----------------|-----------------|-----------------|-----------------|-----------------|-----------------|
|                  |                                         | Cmax/MIC ≥<br>8 | AUC/MIC ≥<br>75 |
| <b>10</b>        | Optimal dose (g)                        | 3.15            | 1.8             | 3.3             | 1.9             | 3.45            | 1.95            | 3.6             | 2               | 3.75            | 2.05            | 3.9             | 2.1             |
|                  | Target attainment (%)                   | 92.01           | 91.47           | 92.01           | 93.28           | 92.01           | 93.28           | 92.01           | 93.28           | 92.01           | 93.28           | 92.01           | 93.28           |
|                  | Cmin 24 ≤ 2.5 mg/L (%)                  | 0               | 0               | 0               | 0               | 0               | 0               | 0               | 0               | 0               | 0               | 0               | 0               |
|                  | Cmin 48 ≤ 2.5 mg/L (%)                  | 0               | 1.81            | 0               | 1.81            | 0               | 1.81            | 0               | 0               | 0               | 0               | 0               | 0               |
| <b>20</b>        | Optimal dose (g)                        | 3.2             | 2               | 3.35            | 2.1             | 3.5             | 2.15            | 3.65            | 2.2             | 3.8             | 2.3             | 3.95            | 2.35            |
|                  | Target attainment (%)                   | 92.01           | 90.27           | 92.01           | 90.27           | 92.01           | 90.27           | 92.01           | 90.27           | 92.01           | 90.27           | 92.01           | 90.27           |
|                  | Cmin 24 ≤ 2.5 mg/L (%)                  | 0               | 1.81            | 0               | 0               | 0               | 0               | 0               | 0               | 0               | 0               | 0               | 0               |
|                  | Cmin 48 ≤ 2.5 mg/L (%)                  | 1.81            | 1.81            | 1.81            | 1.81            | 1.81            | 1.81            | 1.81            | 1.81            | 1.81            | 1.81            | 1.81            | 1.81            |
| <b>30</b>        | Optimal dose (g)                        | 3.25            | 2.25            | 3.4             | 2.3             | 3.55            | 2.35            | 3.7             | 2.4             | 3.85            | 2.5             | 4               | 2.55            |
|                  | Target attainment (%)                   | 92.01           | 90.27           | 92.01           | 90.27           | 92.01           | 90.27           | 92.01           | 90.27           | 92.01           | 90.27           | 92.01           | 90.27           |
|                  | Cmin 24 ≤ 2.5 mg/L (%)                  | 1.81            | 1.81            | 1.81            | 1.81            | 1.81            | 1.81            | 1.81            | 1.81            | 1.81            | 1.81            | 1.81            | 1.81            |
|                  | Cmin 48 ≤ 2.5 mg/L (%)                  | 1.81            | 6.84            | 1.81            | 6.84            | 1.81            | 6.84            | 1.81            | 1.81            | 1.81            | 1.81            | 1.81            | 1.81            |
| <b>40</b>        | Optimal dose (g)                        | 3.25            | 2.45            | 3.4             | 2.5             | 3.55            | 2.6             | 3.7             | 2.65            | 3.9             | 2.7             | 4.05            | 2.75            |
|                  | Target attainment (%)                   | 92.01           | 90.27           | 92.01           | 90.27           | 92.01           | 90.27           | 92.01           | 90.27           | 92.01           | 90.27           | 92.01           | 90.27           |
|                  | Cmin 24 ≤ 2.5 mg/L (%)                  | 1.81            | 1.81            | 1.81            | 1.81            | 1.81            | 1.81            | 1.81            | 1.81            | 1.81            | 1.81            | 1.81            | 1.81            |
|                  | Cmin 48 ≤ 2.5 mg/L (%)                  | 10.29           | 10.29           | 10.29           | 10.29           | 6.84            | 10.29           | 6.84            | 10.29           | 4.72            | 10.29           | 1.81            | 10.29           |
| <b>50</b>        | Optimal dose (g)                        | 3.3             | 2.7             | 3.45            | 2.75            | 3.6             | 2.8             | 3.75            | 2.85            | 3.9             | 2.9             | 4.05            | 2.95            |

|            |                        |       |       |       |       |       |       |       |       |       |       |       |       |
|------------|------------------------|-------|-------|-------|-------|-------|-------|-------|-------|-------|-------|-------|-------|
|            | Target attainment (%)  | 92.01 | 90.27 | 92.01 | 90.27 | 92.01 | 90.27 | 92.01 | 90.27 | 92.01 | 90.27 | 92.01 | 90.27 |
|            | Cmin 24 ≤ 2.5 mg/L (%) | 1.81  | 1.81  | 1.81  | 1.81  | 1.81  | 1.81  | 1.81  | 1.81  | 1.81  | 1.81  | 1.81  | 1.81  |
|            | Cmin 48 ≤ 2.5 mg/L (%) | 13.31 | 17.27 | 13.31 | 15.09 | 10.29 | 13.31 | 10.29 | 13.31 | 10.29 | 13.31 | 10.29 | 13.31 |
| <b>60</b>  | Optimal dose (g)       | 3.35  | 2.95  | 3.5   | 2.95  | 3.65  | 3.05  | 3.8   | 3.1   | 3.95  | 3.15  | 4.1   | 3.2   |
|            | Target attainment (%)  | 92.01 | 90.08 | 92.01 | 90.08 | 92.01 | 92.98 | 92.01 | 90.27 | 92.01 | 90.27 | 92.01 | 90.27 |
|            | Cmin 24 ≤ 2.5 mg/L (%) | 1.81  | 1.81  | 1.81  | 1.81  | 1.81  | 1.81  | 1.81  | 1.81  | 1.81  | 1.81  | 1.81  | 1.81  |
|            | Cmin 48 ≤ 2.5 mg/L (%) | 44.42 | 58.89 | 17.27 | 58.89 | 15.09 | 43.15 | 13.31 | 39.05 | 13.31 | 36.88 | 13.31 | 36.88 |
| <b>70</b>  | Optimal dose (g)       | 3.35  | 3.25  | 3.5   | 3.25  | 3.65  | 3.3   | 3.8   | 3.3   | 3.95  | 3.35  | 4.1   | 3.45  |
|            | Target attainment (%)  | 92.01 | 90.08 | 92.01 | 90.08 | 92.01 | 90.08 | 92.01 | 90.08 | 92.01 | 90.08 | 92.01 | 92.98 |
|            | Cmin 24 ≤ 2.5 mg/L (%) | 4.72  | 4.72  | 4.72  | 4.72  | 1.81  | 4.72  | 1.81  | 4.72  | 1.81  | 1.81  | 1.81  | 1.81  |
|            | Cmin 48 ≤ 2.5 mg/L (%) | 60.13 | 63.27 | 58.89 | 60.13 | 58.89 | 60.13 | 58.89 | 60.13 | 42.24 | 58.89 | 36.88 | 58.89 |
| <b>80</b>  | Optimal dose (g)       | 3.4   | 3.55  | 3.55  | 3.6   | 3.7   | 3.6   | 3.85  | 3.6   | 4     | 3.65  | 4.15  | 3.65  |
|            | Target attainment (%)  | 92.01 | 90.08 | 92.01 | 90.08 | 92.01 | 90.08 | 92.01 | 90.08 | 92.01 | 90.08 | 92.01 | 90.08 |
|            | Cmin 24 ≤ 2.5 mg/L (%) | 10.29 | 10.29 | 10.29 | 10.29 | 4.72  | 4.72  | 4.72  | 4.72  | 4.72  | 4.72  | 1.81  | 4.72  |
|            | Cmin 48 ≤ 2.5 mg/L (%) | 63.27 | 63.27 | 63.27 | 63.27 | 63.27 | 63.27 | 60.13 | 63.27 | 60.13 | 63.27 | 60.13 | 60.13 |
| <b>90</b>  | Optimal dose (g)       | 3.4   | 3.9   | 3.6   | 3.9   | 3.75  | 3.9   | 3.9   | 3.95  | 4.05  | 3.95  | 4.2   | 3.95  |
|            | Target attainment (%)  | 92.01 | 90.08 | 92.01 | 90.08 | 92.01 | 90.08 | 92.01 | 90.08 | 92.01 | 90.08 | 92.01 | 90.08 |
|            | Cmin 24 ≤ 2.5 mg/L (%) | 10.29 | 10.29 | 10.29 | 10.29 | 10.29 | 10.29 | 10.29 | 10.29 | 4.72  | 8.17  | 4.72  | 4.72  |
|            | Cmin 48 ≤ 2.5 mg/L (%) | 64.62 | 63.27 | 63.27 | 63.27 | 63.27 | 63.27 | 63.27 | 63.27 | 63.27 | 63.27 | 63.27 | 63.27 |
| <b>100</b> | Optimal dose (g)       | 3.45  | 4.2   | 3.6   | 4.2   | 3.75  | 4.2   | 3.9   | 4.25  | 4.05  | 4.25  | 4.2   | 4.25  |
|            | Target attainment (%)  | 92.01 | 92.25 | 92.01 | 90.08 | 92.01 | 90.08 | 92.01 | 90.08 | 92.01 | 90.08 | 92.01 | 90.08 |
|            | Cmin 24 ≤ 2.5 mg/L (%) | 25.42 | 10.29 | 10.29 | 10.29 | 10.29 | 10.29 | 10.29 | 10.29 | 10.29 | 10.29 | 10.29 | 10.29 |
|            | Cmin 48 ≤ 2.5 mg/L (%) | 71.44 | 64.62 | 70.44 | 64.62 | 64.62 | 64.62 | 64.62 | 63.27 | 63.27 | 63.27 | 63.27 | 63.27 |
| <b>110</b> | Optimal dose (g)       | 3.5   | 4.5   | 3.65  | 4.5   | 3.8   | 4.55  | 3.95  | 4.55  | 4.1   | 4.55  | 4.25  | 4.6   |
|            | Target attainment (%)  | 92.01 | 92.25 | 92.01 | 92.25 | 92.01 | 92.25 | 92.01 | 90.08 | 92.01 | 90.08 | 92.01 | 90.08 |
|            | Cmin 24 ≤ 2.5 mg/L (%) | 38.28 | 13.31 | 38.28 | 13.31 | 28.61 | 10.29 | 10.29 | 10.29 | 10.29 | 10.29 | 10.29 | 10.29 |
|            | Cmin 48 ≤ 2.5 mg/L (%) | 74.15 | 70.44 | 71.44 | 70.44 | 71.44 | 64.62 | 70.44 | 64.62 | 70.44 | 64.62 | 64.62 | 64.62 |

|            |                        |       |       |       |       |       |       |       |       |       |       |       |       |
|------------|------------------------|-------|-------|-------|-------|-------|-------|-------|-------|-------|-------|-------|-------|
| <b>120</b> | Optimal dose (g)       | 3.5   | 4.8   | 3.65  | 4.8   | 3.8   | 4.85  | 3.95  | 4.85  | 4.1   | 4.85  | 4.3   | 4.9   |
|            | Target attainment (%)  | 92.01 | 92.25 | 92.01 | 92.25 | 92.01 | 92.25 | 92.01 | 92.25 | 92.01 | 90.08 | 92.01 | 90.08 |
|            | Cmin 24 ≤ 2.5 mg/L (%) | 47.03 | 35.09 | 44    | 25.42 | 38.28 | 25.42 | 38.28 | 10.29 | 28.61 | 10.29 | 13.48 | 10.29 |
|            | Cmin 48 ≤ 2.5 mg/L (%) | 82.17 | 71.44 | 78.04 | 71.44 | 74.15 | 70.44 | 71.44 | 70.44 | 71.44 | 70.44 | 70.44 | 70.44 |
| <b>130</b> | Optimal dose (g)       | 3.55  | > 5   | 3.7   | > 5   | 3.85  | > 5   | 4     | > 5   | 4.15  | > 5   | 4.3   | > 5   |
|            | Target attainment (%)  | 92.01 | 88.8  | 92.01 | 88.8  | 92.01 | 86.63 | 92.01 | 86.63 | 92.01 | 86.63 | 92.01 | 86.63 |
|            | Cmin 24 ≤ 2.5 mg/L (%) | 61.09 | 38.28 | 53.47 | 38.28 | 47.03 | 38.28 | 38.28 | 28.61 | 38.28 | 28.61 | 28.61 | 28.61 |
|            | Cmin 48 ≤ 2.5 mg/L (%) | 87.77 | 74.15 | 87.77 | 74.15 | 86.13 | 71.44 | 79.72 | 71.44 | 75.5  | 71.44 | 71.44 | 71.44 |
| <b>140</b> | Optimal dose (g)       | 3.6   | > 5   | 3.75  | > 5   | 3.9   | > 5   | 4.05  | > 5   | 4.2   | > 5   | 4.35  | > 5   |
|            | Target attainment (%)  | 92.01 | 86.63 | 92.01 | 86.63 | 92.01 | 86.63 | 92.01 | 86.63 | 92.01 | 86.63 | 92.01 | 86.63 |
|            | Cmin 24 ≤ 2.5 mg/L (%) | 62.36 | 50.33 | 61.09 | 47.03 | 58.92 | 44    | 53.47 | 38.28 | 48.39 | 38.28 | 38.28 | 38.28 |
|            | Cmin 48 ≤ 2.5 mg/L (%) | 92.99 | 80.49 | 92.07 | 78.04 | 87.77 | 75.5  | 87.77 | 75.5  | 83.68 | 71.44 | 79.72 | 71.44 |
| <b>150</b> | Optimal dose (g)       | 3.6   | > 5   | 3.75  | > 5   | 3.9   | > 5   | 4.05  | > 5   | 4.2   | > 5   | 4.35  | > 5   |
|            | Target attainment (%)  | 92.01 | 86.63 | 92.01 | 85.36 | 92.01 | 83.57 | 92.01 | 83.57 | 92.01 | 83.57 | 92.01 | 83.57 |
|            | Cmin 24 ≤ 2.5 mg/L (%) | 63.27 | 57.95 | 62.36 | 55.78 | 61.09 | 50.33 | 58.92 | 47.03 | 53.47 | 45.25 | 50.18 | 44    |
|            | Cmin 48 ≤ 2.5 mg/L (%) | 92.99 | 87.77 | 92.99 | 87.77 | 92.99 | 86.13 | 92.07 | 82.17 | 87.77 | 79.72 | 87.77 | 79.72 |
| <b>160</b> | Optimal dose (g)       | 3.65  | > 5   | 3.8   | > 5   | 3.95  | > 5   | 4.1   | > 5   | 4.25  | > 5   | 4.4   | > 5   |
|            | Target attainment (%)  | 92.01 | 80.55 | 92.01 | 80.55 | 92.01 | 80.55 | 92.01 | 80.55 | 92.01 | 80.55 | 92.01 | 80.55 |
|            | Cmin 24 ≤ 2.5 mg/L (%) | 64.62 | 62.36 | 64.62 | 61.09 | 64.62 | 61.09 | 61.09 | 58.92 | 61.09 | 53.47 | 58.92 | 50.18 |
|            | Cmin 48 ≤ 2.5 mg/L (%) | 92.99 | 92.99 | 92.99 | 92.07 | 92.99 | 87.77 | 92.99 | 87.77 | 92.07 | 87.77 | 92.07 | 87.77 |
| <b>170</b> | Optimal dose (g)       | 3.65  | > 5   | 3.8   | > 5   | 3.95  | > 5   | 4.1   | > 5   | 4.25  | > 5   | 4.4   | > 5   |
|            | Target attainment (%)  | 92.01 | 80.55 | 92.01 | 80.55 | 92.01 | 80.55 | 92.01 | 80.55 | 92.01 | 80.55 | 92.01 | 80.55 |
|            | Cmin 24 ≤ 2.5 mg/L (%) | 64.62 | 63.27 | 64.62 | 62.36 | 64.62 | 62.36 | 64.62 | 61.09 | 63.71 | 61.09 | 61.09 | 58.92 |
|            | Cmin 48 ≤ 2.5 mg/L (%) | 92.99 | 92.99 | 92.99 | 92.99 | 92.99 | 92.99 | 92.99 | 92.07 | 92.99 | 92.07 | 92.07 | 92.07 |
| <b>180</b> | Optimal dose (g)       | 3.7   | > 5   | 3.85  | > 5   | 4     | > 5   | 4.15  | > 5   | 4.3   | > 5   | 4.45  | > 5   |
|            | Target attainment (%)  | 92.01 | 80.55 | 92.01 | 80.55 | 92.01 | 80.55 | 92.01 | 80.55 | 92.01 | 80.55 | 92.01 | 80.55 |
|            | Cmin 24 ≤ 2.5 mg/L (%) | 70.44 | 63.27 | 64.62 | 63.27 | 64.62 | 63.27 | 64.62 | 62.36 | 64.62 | 62.36 | 63.71 | 61.09 |



|            |                        |       |       |       |       |       |       |       |       |       |       |       |       |
|------------|------------------------|-------|-------|-------|-------|-------|-------|-------|-------|-------|-------|-------|-------|
|            | Cmin 48 ≤ 2.5 mg/L (%) | 92.99 | 92.99 | 92.99 | 92.99 | 92.99 | 92.99 | 92.99 | 92.99 | 92.99 | 92.99 | 92.07 |       |
| <b>190</b> | Optimal dose (g)       | 3.75  | > 5   | 3.9   | > 5   | 4.05  | > 5   | 4.2   | > 5   | 4.35  | > 5   | 4.5   | > 5   |
|            | Target attainment (%)  | 92.01 | 80.55 | 92.01 | 80.55 | 92.01 | 80.55 | 92.01 | 80.55 | 92.01 | 77.84 | 92.01 | 77.84 |
|            | Cmin 24 ≤ 2.5 mg/L (%) | 70.44 | 64.62 | 70.44 | 64.62 | 64.62 | 64.62 | 64.62 | 64.62 | 64.62 | 64.62 | 64.62 | 63.71 |
|            | Cmin 48 ≤ 2.5 mg/L (%) | 94.47 | 92.99 | 94.47 | 92.99 | 92.99 | 92.99 | 92.99 | 92.99 | 92.99 | 92.99 | 92.99 | 92.99 |
| <b>200</b> | Optimal dose (g)       | 3.75  | > 5   | 3.9   | > 5   | 4.05  | > 5   | 4.2   | > 5   | 4.35  | > 5   | 4.5   | > 5   |
|            | Target attainment (%)  | 92.01 | 80.55 | 92.01 | 77.84 | 92.01 | 77.84 | 92.01 | 77.84 | 92.01 | 77.84 | 92.01 | 77.84 |
|            | Cmin 24 ≤ 2.5 mg/L (%) | 70.44 | 70.44 | 70.44 | 64.62 | 70.44 | 64.62 | 70.44 | 64.62 | 64.62 | 64.62 | 64.62 | 64.62 |
|            | Cmin 48 ≤ 2.5 mg/L (%) | 94.47 | 92.99 | 94.47 | 92.99 | 94.47 | 92.99 | 92.99 | 92.99 | 92.99 | 92.99 | 92.99 | 92.99 |
| <b>210</b> | Optimal dose (g)       | 3.8   | > 5   | 3.95  | > 5   | 4.1   | > 5   | 4.25  | > 5   | 4.4   | > 5   | 4.55  | > 5   |
|            | Target attainment (%)  | 92.01 | 59.42 | 92.01 | 59.42 | 92.01 | 59.42 | 92.01 | 59.42 | 92.01 | 59.42 | 92.01 | 59.42 |
|            | Cmin 24 ≤ 2.5 mg/L (%) | 77.08 | 70.44 | 70.44 | 70.44 | 70.44 | 70.44 | 70.44 | 64.62 | 70.44 | 64.62 | 64.62 | 64.62 |
|            | Cmin 48 ≤ 2.5 mg/L (%) | 94.47 | 92.99 | 94.47 | 92.99 | 94.47 | 92.99 | 94.47 | 92.99 | 94.47 | 92.99 | 92.99 | 92.99 |
| <b>220</b> | Optimal dose (g)       | 3.8   | > 5   | 3.95  | > 5   | 4.1   | > 5   | 4.25  | > 5   | 4.4   | > 5   | 4.55  | > 5   |
|            | Target attainment (%)  | 92.01 | 59.42 | 92.01 | 59.42 | 92.01 | 47.31 | 92.01 | 41.59 | 92.01 | 41.59 | 92.01 | 41.59 |
|            | Cmin 24 ≤ 2.5 mg/L (%) | 78.44 | 70.44 | 77.08 | 70.44 | 74.41 | 70.44 | 70.44 | 70.44 | 70.44 | 70.44 | 70.44 | 64.62 |
|            | Cmin 48 ≤ 2.5 mg/L (%) | 94.47 | 94.47 | 94.47 | 94.47 | 94.47 | 94.47 | 94.47 | 92.99 | 94.47 | 92.99 | 94.47 | 92.99 |
| <b>230</b> | Optimal dose (g)       | 3.85  | > 5   | 4     | > 5   | 4.15  | > 5   | 4.3   | > 5   | 4.45  | > 5   | 4.6   | > 5   |
|            | Target attainment (%)  | 93.28 | 41.59 | 92.01 | 41.59 | 92.01 | 41.59 | 92.01 | 41.59 | 92.01 | 41.59 | 92.01 | 41.59 |
|            | Cmin 24 ≤ 2.5 mg/L (%) | 78.44 | 71.44 | 78.44 | 70.44 | 77.08 | 70.44 | 74.41 | 70.44 | 70.44 | 70.44 | 70.44 | 70.44 |
|            | Cmin 48 ≤ 2.5 mg/L (%) | 96.83 | 94.47 | 96.83 | 94.47 | 94.47 | 94.47 | 94.47 | 94.47 | 94.47 | 94.47 | 94.47 | 94.47 |
| <b>240</b> | Optimal dose (g)       | 3.9   | > 5   | 4.05  | > 5   | 4.2   | > 5   | 4.35  | > 5   | 4.5   | > 5   | 4.65  | > 5   |
|            | Target attainment (%)  | 93.28 | 41.59 | 93.28 | 41.59 | 92.01 | 41.59 | 92.01 | 41.59 | 92.01 | 41.59 | 92.01 | 41.59 |
|            | Cmin 24 ≤ 2.5 mg/L (%) | 78.44 | 78.44 | 78.44 | 77.08 | 78.44 | 74.41 | 77.08 | 70.44 | 74.41 | 70.44 | 70.44 | 70.44 |
|            | Cmin 48 ≤ 2.5 mg/L (%) | 96.83 | 94.47 | 96.83 | 94.47 | 96.83 | 94.47 | 94.47 | 94.47 | 94.47 | 94.47 | 94.47 | 94.47 |
| <b>250</b> | Optimal dose (g)       | 3.9   | > 5   | 4.05  | > 5   | 4.2   | > 5   | 4.35  | > 5   | 4.5   | > 5   | 4.65  | > 5   |
|            | Target attainment (%)  | 93.28 | 41.59 | 92.01 | 41.59 | 92.01 | 41.59 | 92.01 | 41.59 | 92.01 | 41.59 | 92.01 | 40.35 |

|                        |       |       |       |       |       |       |       |       |       |       |       |       |
|------------------------|-------|-------|-------|-------|-------|-------|-------|-------|-------|-------|-------|-------|
| Cmin 24 ≤ 2.5 mg/L (%) | 85.27 | 78.44 | 78.44 | 78.44 | 78.44 | 77.08 | 78.44 | 76.09 | 77.08 | 74.41 | 76.09 | 74.41 |
| Cmin 48 ≤ 2.5 mg/L (%) | 96.83 | 94.47 | 96.83 | 94.47 | 96.83 | 94.47 | 96.83 | 94.47 | 94.47 | 94.47 | 94.47 | 94.47 |

**Table S2: Optimal initial amikacin dosing recommendations based on CLCG and BSA with associated efficacy and safety target attainment rates assuming a MIC value of 4 mg/L**

Abbreviations: BSA, Body Surface Area; CLCG, Creatinine clearance estimated by Cockcroft & Gault equation; MIC, bacterial minimal inhibitory concentration; C<sub>max</sub>/MIC ≥ 8, probability of amikacin maximal plasma concentration over MIC ratio ≥ 8, AUC/MIC ≥ 75, probability of amikacin daily area under the curve over MIC ratio ≥ 75; C<sub>min</sub> 24 ≤ 2.5 mg/L, amikacin plasma concentration at 24h ≤ 2.5 mg/L probability; C<sub>min</sub> 48, amikacin plasma concentration at 48h ≤ 2.5 mg/L probability.

The maximal dose was capped to 5 g.

|               | BSA (m <sup>2</sup> )              | 1.5                       |              | 1.6                       |              | 1.7                       |              | 1.8                       |              | 1.9                       |              |
|---------------|------------------------------------|---------------------------|--------------|---------------------------|--------------|---------------------------|--------------|---------------------------|--------------|---------------------------|--------------|
| CLCG (mL/min) | Targeted index                     | C <sub>max</sub> /MIC ≥ 8 | AUC/MIC ≥ 75 | C <sub>max</sub> /MIC ≥ 8 | AUC/MIC ≥ 75 | C <sub>max</sub> /MIC ≥ 8 | AUC/MIC ≥ 75 | C <sub>max</sub> /MIC ≥ 8 | AUC/MIC ≥ 75 | C <sub>max</sub> /MIC ≥ 8 | AUC/MIC ≥ 75 |
| 10            | Optimal dose (g)                   | 1.2                       | 0.75         | 1.3                       | 0.8          | 1.35                      | 0.85         | 1.45                      | 0.85         | 1.5                       | 0.9          |
|               | Target attainment (%)              | 92.01                     | 90.27        | 92.01                     | 92.39        | 92.01                     | 94.56        | 92.01                     | 92.39        | 92.01                     | 92.39        |
|               | C <sub>min</sub> 24 ≤ 2.5 mg/L (%) | 0                         | 1.81         | 0                         | 0            | 0                         | 0            | 0                         | 0            | 0                         | 0            |
|               | C <sub>min</sub> 48 ≤ 2.5 mg/L (%) | 1.81                      | 1.81         | 1.81                      | 1.81         | 1.81                      | 1.81         | 1.81                      | 1.81         | 1.81                      | 1.81         |
| 20            | Optimal dose (g)                   | 1.25                      | 0.85         | 1.3                       | 0.9          | 1.4                       | 0.9          | 1.45                      | 0.95         | 1.55                      | 1            |
|               | Target attainment (%)              | 92.01                     | 90.27        | 92.01                     | 90.27        | 92.01                     | 90.27        | 92.01                     | 90.27        | 92.01                     | 90.27        |
|               | C <sub>min</sub> 24 ≤ 2.5 mg/L (%) | 1.81                      | 1.81         | 1.81                      | 1.81         | 1.81                      | 1.81         | 1.81                      | 1.81         | 1.81                      | 1.81         |
|               | C <sub>min</sub> 48 ≤ 2.5 mg/L (%) | 6.84                      | 14.21        | 6.84                      | 10.29        | 3.93                      | 10.29        | 1.81                      | 10.29        | 1.81                      | 10.29        |
| 30            | Optimal dose (g)                   | 1.25                      | 1            | 1.3                       | 1            | 1.4                       | 1.05         | 1.45                      | 1.05         | 1.55                      | 1.1          |
|               | Target attainment (%)              | 92.01                     | 92.98        | 92.01                     | 90.27        | 92.01                     | 90.27        | 92.01                     | 90.27        | 92.01                     | 90.27        |
|               | C <sub>min</sub> 24 ≤ 2.5 mg/L (%) | 1.81                      | 1.81         | 1.81                      | 1.81         | 1.81                      | 1.81         | 1.81                      | 1.81         | 1.81                      | 1.81         |
|               | C <sub>min</sub> 48 ≤ 2.5 mg/L (%) | 18.18                     | 58.89        | 18.18                     | 58.89        | 13.3                      | 44.42        | 13.3                      | 41.23        | 10.29                     | 18.18        |
| 40            | Optimal dose (g)                   | 1.25                      | 1.1          | 1.35                      | 1.15         | 1.4                       | 1.15         | 1.5                       | 1.2          | 1.55                      | 1.2          |
|               | Target attainment (%)              | 92.01                     | 92.98        | 92.01                     | 92.98        | 92.01                     | 90.27        | 92.01                     | 90.27        | 92.01                     | 90.27        |
|               | C <sub>min</sub> 24 ≤ 2.5 mg/L (%) | 10.29                     | 10.29        | 4.72                      | 10.29        | 4.72                      | 6.84         | 1.81                      | 4.72         | 1.81                      | 4.72         |
|               | C <sub>min</sub> 48 ≤ 2.5 mg/L (%) | 63.27                     | 63.27        | 63.27                     | 63.27        | 58.89                     | 63.27        | 58.89                     | 63.27        | 44.42                     | 63.27        |

|            |                        |       |       |       |       |       |       |       |       |       |       |
|------------|------------------------|-------|-------|-------|-------|-------|-------|-------|-------|-------|-------|
| <b>50</b>  | Optimal dose (g)       | 1.3   | 1.25  | 1.35  | 1.25  | 1.45  | 1.3   | 1.5   | 1.3   | 1.6   | 1.35  |
|            | Target attainment (%)  | 92.01 | 90.08 | 92.01 | 90.08 | 92.01 | 92.98 | 92.01 | 90.08 | 92.01 | 92.98 |
|            | Cmin 24 ≤ 2.5 mg/L (%) | 10.29 | 10.29 | 10.29 | 10.29 | 10.29 | 10.29 | 10.29 | 10.29 | 4.72  | 10.29 |
|            | Cmin 48 ≤ 2.5 mg/L (%) | 64.62 | 67.34 | 64.62 | 64.62 | 63.27 | 64.62 | 63.27 | 64.62 | 63.27 | 63.27 |
| <b>60</b>  | Optimal dose (g)       | 1.3   | 1.4   | 1.35  | 1.45  | 1.45  | 1.45  | 1.5   | 1.45  | 1.6   | 1.45  |
|            | Target attainment (%)  | 92.01 | 90.08 | 92.01 | 90.08 | 92.01 | 90.08 | 92.01 | 90.08 | 92.01 | 90.08 |
|            | Cmin 24 ≤ 2.5 mg/L (%) | 40.07 | 25.42 | 25.42 | 13.3  | 13.3  | 13.3  | 10.29 | 10.29 | 10.29 | 10.29 |
|            | Cmin 48 ≤ 2.5 mg/L (%) | 74.15 | 74.15 | 74.15 | 74.15 | 74.15 | 74.15 | 70.44 | 71.44 | 64.62 | 70.44 |
| <b>70</b>  | Optimal dose (g)       | 1.3   | 1.6   | 1.4   | 1.6   | 1.45  | 1.6   | 1.55  | 1.6   | 1.6   | 1.65  |
|            | Target attainment (%)  | 92.01 | 92.25 | 92.01 | 90.08 | 92.01 | 90.08 | 92.01 | 90.08 | 92.01 | 90.08 |
|            | Cmin 24 ≤ 2.5 mg/L (%) | 63.27 | 45.79 | 50.33 | 40.07 | 40.07 | 38.28 | 38.28 | 28.61 | 28.61 | 28.61 |
|            | Cmin 48 ≤ 2.5 mg/L (%) | 88.69 | 80.49 | 87.77 | 78.44 | 82.17 | 74.15 | 74.15 | 74.15 | 74.15 | 74.15 |
| <b>80</b>  | Optimal dose (g)       | 1.35  | 1.75  | 1.4   | 1.75  | 1.5   | 1.75  | 1.55  | 1.8   | 1.65  | 1.8   |
|            | Target attainment (%)  | 92.01 | 92.25 | 92.01 | 92.25 | 92.01 | 90.08 | 92.01 | 92.25 | 92.01 | 90.08 |
|            | Cmin 24 ≤ 2.5 mg/L (%) | 63.27 | 57.95 | 63.27 | 57.95 | 62    | 45.79 | 53.47 | 40.07 | 45.79 | 38.28 |
|            | Cmin 48 ≤ 2.5 mg/L (%) | 92.99 | 88.69 | 92.99 | 87.77 | 92.99 | 86.13 | 87.77 | 82.17 | 86.13 | 78.04 |
| <b>90</b>  | Optimal dose (g)       | 1.35  | 1.9   | 1.4   | 1.9   | 1.5   | 1.95  | 1.55  | 1.95  | 1.65  | 1.95  |
|            | Target attainment (%)  | 92.01 | 92.25 | 92.01 | 92.25 | 92.01 | 92.25 | 92.01 | 92.25 | 92.01 | 92.25 |
|            | Cmin 24 ≤ 2.5 mg/L (%) | 64.62 | 63.27 | 64.62 | 63.27 | 63.27 | 61.09 | 63.27 | 53.47 | 61.09 | 50.18 |
|            | Cmin 48 ≤ 2.5 mg/L (%) | 92.99 | 92.99 | 92.99 | 92.99 | 92.99 | 87.77 | 92.99 | 87.77 | 92.99 | 87.77 |
| <b>100</b> | Optimal dose (g)       | 1.35  | 2.05  | 1.45  | 2.1   | 1.5   | 2.1   | 1.6   | 2.1   | 1.65  | 2.1   |
|            | Target attainment (%)  | 92.01 | 92.25 | 92.01 | 92.25 | 92.01 | 92.25 | 92.01 | 92.25 | 92.01 | 92.25 |
|            | Cmin 24 ≤ 2.5 mg/L (%) | 70.44 | 63.27 | 64.62 | 63.27 | 64.62 | 63.27 | 64.62 | 62.36 | 64.62 | 61.09 |
|            | Cmin 48 ≤ 2.5 mg/L (%) | 94.47 | 92.99 | 92.99 | 92.99 | 92.99 | 92.99 | 92.99 | 92.99 | 92.99 | 92.07 |
| <b>110</b> | Optimal dose (g)       | 1.4   | 2.2   | 1.45  | 2.25  | 1.55  | 2.25  | 1.6   | 2.25  | 1.7   | 2.25  |
|            | Target attainment (%)  | 93.28 | 92.25 | 92.01 | 92.25 | 92.01 | 92.25 | 92.01 | 92.25 | 92.01 | 92.25 |
|            | Cmin 24 ≤ 2.5 mg/L (%) | 71.44 | 63.27 | 70.44 | 63.27 | 70.44 | 63.27 | 64.62 | 63.27 | 64.62 | 63.27 |

|            |                        |       |       |       |       |       |       |       |       |       |       |
|------------|------------------------|-------|-------|-------|-------|-------|-------|-------|-------|-------|-------|
|            | Cmin 48 ≤ 2.5 mg/L (%) | 94.47 | 92.99 | 94.47 | 92.99 | 94.47 | 92.99 | 92.99 | 92.99 | 92.99 | 92.99 |
| <b>120</b> | Optimal dose (g)       | 1.4   | 2.4   | 1.45  | 2.4   | 1.55  | 2.4   | 1.6   | 2.4   | 1.7   | 2.4   |
|            | Target attainment (%)  | 92.01 | 92.25 | 92.01 | 92.25 | 92.01 | 92.25 | 92.01 | 92.25 | 92.01 | 92.25 |
|            | Cmin 24 ≤ 2.5 mg/L (%) | 78.44 | 64.62 | 75.4  | 64.62 | 70.44 | 64.62 | 70.44 | 64.62 | 64.62 | 63.27 |
|            | Cmin 48 ≤ 2.5 mg/L (%) | 96.83 | 92.99 | 94.47 | 92.99 | 94.47 | 92.99 | 94.47 | 92.99 | 94.47 | 92.99 |
| <b>130</b> | Optimal dose (g)       | 1.4   | 2.55  | 1.5   | 2.55  | 1.55  | 2.55  | 1.65  | 2.55  | 1.7   | 2.55  |
|            | Target attainment (%)  | 92.01 | 92.25 | 93.28 | 92.25 | 92.01 | 92.25 | 92.01 | 92.25 | 92.01 | 92.25 |
|            | Cmin 24 ≤ 2.5 mg/L (%) | 83.68 | 70.44 | 78.44 | 64.62 | 77.08 | 64.62 | 70.44 | 64.62 | 70.44 | 64.62 |
|            | Cmin 48 ≤ 2.5 mg/L (%) | 96.83 | 92.99 | 96.83 | 92.99 | 96.83 | 92.99 | 94.47 | 92.99 | 94.47 | 92.99 |
| <b>140</b> | Optimal dose (g)       | 1.4   | 2.7   | 1.5   | 2.7   | 1.55  | 2.7   | 1.65  | 2.7   | 1.75  | 2.7   |
|            | Target attainment (%)  | 92.01 | 92.25 | 92.01 | 92.25 | 92.01 | 92.25 | 92.01 | 92.25 | 92.01 | 92.25 |
|            | Cmin 24 ≤ 2.5 mg/L (%) | 92.07 | 70.44 | 83.68 | 70.44 | 78.44 | 70.44 | 77.08 | 64.62 | 74.41 | 64.62 |
|            | Cmin 48 ≤ 2.5 mg/L (%) | 96.83 | 94.47 | 96.83 | 92.99 | 96.83 | 92.99 | 96.83 | 92.99 | 94.47 | 92.99 |
| <b>150</b> | Optimal dose (g)       | 1.45  | 2.85  | 1.5   | 2.85  | 1.6   | 2.85  | 1.65  | 2.85  | 1.75  | 2.85  |
|            | Target attainment (%)  | 93.28 | 92.25 | 92.01 | 92.25 | 92.01 | 92.25 | 92.01 | 92.25 | 92.01 | 92.25 |
|            | Cmin 24 ≤ 2.5 mg/L (%) | 92.07 | 70.44 | 92.07 | 70.44 | 83.68 | 70.44 | 78.44 | 70.44 | 78.44 | 64.62 |
|            | Cmin 48 ≤ 2.5 mg/L (%) | 96.83 | 94.47 | 96.83 | 94.47 | 96.83 | 94.47 | 96.83 | 92.99 | 96.83 | 92.99 |
| <b>160</b> | Optimal dose (g)       | 1.45  | 2.95  | 1.55  | 3     | 1.6   | 3     | 1.7   | 3     | 1.75  | 3     |
|            | Target attainment (%)  | 93.28 | 92.25 | 93.28 | 92.25 | 92.01 | 92.25 | 93.28 | 92.25 | 92.01 | 92.25 |
|            | Cmin 24 ≤ 2.5 mg/L (%) | 92.07 | 71.44 | 92.07 | 70.44 | 90.55 | 70.44 | 83.68 | 70.44 | 78.44 | 70.44 |
|            | Cmin 48 ≤ 2.5 mg/L (%) | 96.83 | 94.47 | 96.83 | 94.47 | 96.83 | 94.47 | 96.83 | 94.47 | 96.83 | 94.47 |
| <b>170</b> | Optimal dose (g)       | 1.45  | 3.1   | 1.55  | 3.15  | 1.6   | 3.15  | 1.7   | 3.15  | 1.75  | 3.15  |
|            | Target attainment (%)  | 92.01 | 92.25 | 93.28 | 92.25 | 92.01 | 92.25 | 92.01 | 92.25 | 92.01 | 92.25 |
|            | Cmin 24 ≤ 2.5 mg/L (%) | 92.99 | 72.79 | 92.07 | 71.44 | 92.07 | 70.44 | 89.62 | 70.44 | 83.68 | 70.44 |
|            | Cmin 48 ≤ 2.5 mg/L (%) | 99.28 | 94.47 | 96.83 | 94.47 | 96.83 | 94.47 | 96.83 | 94.47 | 96.83 | 94.47 |
| <b>180</b> | Optimal dose (g)       | 1.5   | 3.25  | 1.55  | 3.25  | 1.65  | 3.3   | 1.7   | 3.3   | 1.8   | 3.3   |
|            | Target attainment (%)  | 93.28 | 92.25 | 93.28 | 92.25 | 93.28 | 92.25 | 92.01 | 92.25 | 93.28 | 92.25 |

|            |                        |       |       |       |       |       |       |       |       |       |       |
|------------|------------------------|-------|-------|-------|-------|-------|-------|-------|-------|-------|-------|
|            | Cmin 24 ≤ 2.5 mg/L (%) | 94.47 | 78.44 | 94.47 | 74.47 | 92.07 | 71.44 | 92.07 | 70.44 | 89.62 | 70.44 |
|            | Cmin 48 ≤ 2.5 mg/L (%) | 100   | 94.47 | 99.28 | 94.47 | 96.83 | 94.47 | 96.83 | 94.47 | 96.83 | 94.47 |
| <b>190</b> | Optimal dose (g)       | 1.5   | 3.4   | 1.6   | 3.4   | 1.65  | 3.4   | 1.75  | 3.45  | 1.8   | 3.45  |
|            | Target attainment (%)  | 91.47 | 92.25 | 93.28 | 92.25 | 93.28 | 92.25 | 93.28 | 92.25 | 92.01 | 92.25 |
|            | Cmin 24 ≤ 2.5 mg/L (%) | 94.47 | 80.97 | 94.47 | 78.44 | 94.47 | 78.44 | 92.07 | 77.08 | 92.07 | 70.44 |
|            | Cmin 48 ≤ 2.5 mg/L (%) | 100   | 96.83 | 100   | 94.47 | 99.28 | 94.47 | 99.28 | 94.47 | 96.83 | 94.47 |
| <b>200</b> | Optimal dose (g)       | 1.5   | 3.55  | 1.6   | 3.55  | 1.65  | 3.55  | 1.75  | 3.55  | 1.8   | 3.6   |
|            | Target attainment (%)  | 91.47 | 92.25 | 93.28 | 92.25 | 93.28 | 92.25 | 93.28 | 92.25 | 92.01 | 92.25 |
|            | Cmin 24 ≤ 2.5 mg/L (%) | 94.47 | 83.68 | 94.47 | 80.97 | 94.47 | 78.44 | 93.56 | 78.44 | 92.07 | 77.08 |
|            | Cmin 48 ≤ 2.5 mg/L (%) | 100   | 96.83 | 100   | 96.83 | 100   | 94.47 | 99.28 | 94.47 | 99.28 | 94.47 |
| <b>210</b> | Optimal dose (g)       | 1.55  | 3.7   | 1.6   | 3.7   | 1.7   | 3.7   | 1.75  | 3.7   | 1.85  | 3.7   |
|            | Target attainment (%)  | 91.47 | 92.25 | 91.47 | 92.25 | 93.28 | 92.25 | 93.28 | 92.25 | 93.28 | 92.25 |
|            | Cmin 24 ≤ 2.5 mg/L (%) | 94.47 | 85.32 | 94.47 | 83.68 | 94.47 | 78.44 | 94.47 | 78.44 | 93.56 | 78.44 |
|            | Cmin 48 ≤ 2.5 mg/L (%) | 100   | 96.83 | 100   | 96.83 | 100   | 96.83 | 100   | 94.47 | 100   | 94.47 |
| <b>220</b> | Optimal dose (g)       | 1.55  | 3.8   | 1.6   | 3.85  | 1.7   | 3.85  | 1.75  | 3.85  | 1.85  | 3.85  |
|            | Target attainment (%)  | 91.47 | 92.25 | 91.47 | 92.25 | 91.47 | 92.25 | 93.28 | 92.25 | 93.28 | 92.25 |
|            | Cmin 24 ≤ 2.5 mg/L (%) | 96.83 | 92.07 | 96.83 | 85.32 | 94.47 | 80.97 | 94.47 | 78.44 | 94.47 | 78.44 |
|            | Cmin 48 ≤ 2.5 mg/L (%) | 100   | 96.83 | 100   | 96.83 | 100   | 96.83 | 100   | 96.83 | 100   | 96.83 |
| <b>230</b> | Optimal dose (g)       | 1.55  | 3.95  | 1.65  | 3.95  | 1.7   | 4     | 1.8   | 4     | 1.85  | 4     |
|            | Target attainment (%)  | 91.47 | 92.25 | 91.47 | 92.25 | 91.47 | 92.25 | 93.28 | 92.25 | 93.28 | 92.25 |
|            | Cmin 24 ≤ 2.5 mg/L (%) | 96.83 | 92.07 | 96.83 | 92.07 | 96.83 | 85.32 | 94.47 | 80.97 | 94.47 | 78.44 |
|            | Cmin 48 ≤ 2.5 mg/L (%) | 100   | 96.83 | 100   | 96.83 | 100   | 96.83 | 100   | 96.83 | 100   | 96.83 |
| <b>240</b> | Optimal dose (g)       | 1.6   | 4.1   | 1.65  | 4.1   | 1.75  | 4.1   | 1.8   | 4.1   | 1.9   | 4.15  |
|            | Target attainment (%)  | 92.39 | 92.25 | 91.47 | 92.25 | 91.47 | 92.25 | 91.47 | 92.25 | 93.28 | 92.25 |
|            | Cmin 24 ≤ 2.5 mg/L (%) | 96.83 | 92.07 | 96.83 | 92.07 | 96.83 | 92.07 | 96.83 | 83.68 | 94.47 | 80.97 |
|            | Cmin 48 ≤ 2.5 mg/L (%) | 100   | 96.83 | 100   | 96.83 | 100   | 96.83 | 100   | 96.83 | 100   | 96.83 |
| <b>250</b> | Optimal dose (g)       | 1.6   | 4.2   | 1.65  | 4.25  | 1.75  | 4.25  | 1.8   | 4.25  | 1.9   | 4.25  |

|                        |       |       |       |       |       |       |       |       |       |       |
|------------------------|-------|-------|-------|-------|-------|-------|-------|-------|-------|-------|
| Target attainment (%)  | 92.39 | 92.25 | 91.47 | 92.25 | 91.47 | 92.25 | 91.47 | 92.25 | 91.47 | 92.25 |
| Cmin 24 ≤ 2.5 mg/L (%) | 96.83 | 92.07 | 96.83 | 92.07 | 96.83 | 92.07 | 96.83 | 89.62 | 96.83 | 80.97 |
| Cmin 48 ≤ 2.5 mg/L (%) | 100   | 96.83 | 100   | 96.83 | 100   | 96.83 | 100   | 96.83 | 100   | 96.83 |

Table

Table S2 continued

| CLCG<br>(mL/min) | BSA (m2)<br>Targeted index | 2               |                 | 2.1             |                 | 2.2             |                 | 2.3             |                 | 2.4             |                 | 2.5             |                 |
|------------------|----------------------------|-----------------|-----------------|-----------------|-----------------|-----------------|-----------------|-----------------|-----------------|-----------------|-----------------|-----------------|-----------------|
|                  |                            | Cmax/MIC ≥<br>8 | AUC/MIC ≥<br>75 |
| 10               | Optimal dose (g)           | 1.6             | 0.9             | 1.65            | 0.95            | 1.75            | 1               | 1.8             | 1               | 1.9             | 1.05            | 1.95            | 1.05            |
|                  | Target attainment (%)      | 92.01           | 91.47           | 92.01           | 93.28           | 92.01           | 94.2            | 92.01           | 93.28           | 92.01           | 93.28           | 92.01           | 93.28           |
|                  | Cmin 24 ≤ 2.5 mg/L (%)     | 0               | 0               | 0               | 0               | 0               | 0               | 0               | 0               | 0               | 0               | 0               | 0               |
|                  | Cmin 48 ≤ 2.5 mg/L (%)     | 1.81            | 1.81            | 1.81            | 1.81            | 1.81            | 1.81            | 1.81            | 1.81            | 0               | 1.81            | 0               | 1.81            |
| 20               | Optimal dose (g)           | 1.6             | 1               | 1.7             | 1.05            | 1.75            | 1.1             | 1.85            | 1.1             | 1.9             | 1.15            | 2               | 1.2             |
|                  | Target attainment (%)      | 92.01           | 90.27           | 92.01           | 90.27           | 92.01           | 90.27           | 92.01           | 90.27           | 92.01           | 90.27           | 92.01           | 90.27           |
|                  | Cmin 24 ≤ 2.5 mg/L (%)     | 1.81            | 1.81            | 1.81            | 1.81            | 1.81            | 1.81            | 0               | 1.81            | 0               | 1.81            | 0               | 1.81            |
|                  | Cmin 48 ≤ 2.5 mg/L (%)     | 1.81            | 10.29           | 1.81            | 6.84            | 1.81            | 6.84            | 1.81            | 6.84            | 1.81            | 1.81            | 1.81            | 1.81            |
| 30               | Optimal dose (g)           | 1.65            | 1.15            | 1.7             | 1.15            | 1.8             | 1.2             | 1.85            | 1.2             | 1.95            | 1.25            | 2               | 1.3             |
|                  | Target attainment (%)      | 92.01           | 90.27           | 92.01           | 90.27           | 92.01           | 90.27           | 92.01           | 90.27           | 92.01           | 90.27           | 92.01           | 90.27           |
|                  | Cmin 24 ≤ 2.5 mg/L (%)     | 1.81            | 1.81            | 1.81            | 1.81            | 1.81            | 1.81            | 1.81            | 1.81            | 1.81            | 1.81            | 1.81            | 1.81            |
|                  | Cmin 48 ≤ 2.5 mg/L (%)     | 10.29           | 16              | 10.29           | 16              | 10.29           | 13.3            | 10.29           | 13.3            | 6.84            | 10.29           | 6.84            | 10.29           |
| 40               | Optimal dose (g)           | 1.65            | 1.25            | 1.7             | 1.25            | 1.8             | 1.3             | 1.85            | 1.35            | 1.95            | 1.35            | 2.05            | 1.4             |
|                  | Target attainment (%)      | 92.01           | 90.27           | 92.01           | 90.27           | 92.01           | 90.27           | 92.01           | 90.27           | 92.01           | 90.27           | 92.01           | 90.27           |

|            |                        |       |       |       |       |       |       |       |       |       |       |       |       |
|------------|------------------------|-------|-------|-------|-------|-------|-------|-------|-------|-------|-------|-------|-------|
|            | Cmin 24 ≤ 2.5 mg/L (%) | 1.81  | 1.81  | 1.81  | 1.81  | 1.81  | 1.81  | 1.81  | 1.81  | 1.81  | 1.81  | 1.81  |       |
|            | Cmin 48 ≤ 2.5 mg/L (%) | 39.96 | 60.13 | 17.27 | 60.13 | 13.3  | 58.89 | 13.3  | 53.44 | 13.3  | 48.87 | 10.29 | 43.15 |
| <b>50</b>  | Optimal dose (g)       | 1.65  | 1.35  | 1.75  | 1.4   | 1.8   | 1.4   | 1.9   | 1.45  | 1.95  | 1.45  | 2.05  | 1.5   |
|            | Target attainment (%)  | 92.01 | 90.27 | 92.01 | 92.98 | 92.01 | 90.27 | 92.01 | 90.27 | 92.01 | 90.27 | 92.01 | 90.27 |
|            | Cmin 24 ≤ 2.5 mg/L (%) | 4.72  | 10.29 | 1.81  | 4.72  | 1.81  | 4.72  | 1.81  | 4.72  | 1.81  | 1.81  | 1.81  | 1.81  |
|            | Cmin 48 ≤ 2.5 mg/L (%) | 63.27 | 63.27 | 60.13 | 63.27 | 60.13 | 63.27 | 58.89 | 63.27 | 52.16 | 63.27 | 42.24 | 63.27 |
|            |                        |       |       |       |       |       |       |       |       |       |       |       |       |
| <b>60</b>  | Optimal dose (g)       | 1.7   | 1.5   | 1.75  | 1.5   | 1.85  | 1.55  | 1.9   | 1.55  | 2     | 1.6   | 2.05  | 1.6   |
|            | Target attainment (%)  | 92.01 | 90.08 | 92.01 | 90.08 | 92.01 | 92.98 | 92.01 | 90.27 | 92.01 | 92.98 | 92.01 | 90.27 |
|            | Cmin 24 ≤ 2.5 mg/L (%) | 10.29 | 10.29 | 10.29 | 10.29 | 4.72  | 10.29 | 4.72  | 10.29 | 4.72  | 6.84  | 1.81  | 4.72  |
|            | Cmin 48 ≤ 2.5 mg/L (%) | 64.62 | 70.44 | 63.27 | 64.62 | 63.27 | 64.62 | 63.27 | 64.62 | 63.27 | 64.62 | 63.27 | 63.27 |
|            |                        |       |       |       |       |       |       |       |       |       |       |       |       |
| <b>70</b>  | Optimal dose (g)       | 1.7   | 1.65  | 1.75  | 1.65  | 1.85  | 1.65  | 1.9   | 1.65  | 2     | 1.7   | 2.05  | 1.75  |
|            | Target attainment (%)  | 92.01 | 90.08 | 92.01 | 90.08 | 92.01 | 90.08 | 92.01 | 90.08 | 92.01 | 90.08 | 92.01 | 92.98 |
|            | Cmin 24 ≤ 2.5 mg/L (%) | 10.29 | 16.5  | 10.29 | 10.29 | 10.29 | 10.29 | 10.29 | 10.29 | 10.29 | 10.29 | 6.84  | 10.29 |
|            | Cmin 48 ≤ 2.5 mg/L (%) | 71.44 | 74.15 | 70.44 | 71.44 | 70.44 | 71.44 | 64.62 | 70.44 | 64.62 | 70.44 | 64.62 | 70.44 |
|            |                        |       |       |       |       |       |       |       |       |       |       |       |       |
| <b>80</b>  | Optimal dose (g)       | 1.7   | 1.8   | 1.8   | 1.8   | 1.85  | 1.8   | 1.95  | 1.8   | 2     | 1.85  | 2.1   | 1.85  |
|            | Target attainment (%)  | 92.01 | 90.08 | 92.01 | 90.08 | 92.01 | 90.08 | 92.01 | 90.08 | 92.01 | 90.08 | 92.01 | 90.08 |
|            | Cmin 24 ≤ 2.5 mg/L (%) | 38.28 | 38.28 | 28.61 | 28.61 | 28.61 | 28.61 | 13.48 | 25.59 | 13.48 | 13.48 | 10.29 | 13.48 |
|            | Cmin 48 ≤ 2.5 mg/L (%) | 83.68 | 75.5  | 75.5  | 75.5  | 74.15 | 74.15 | 71.44 | 71.44 | 70.44 | 71.44 | 70.44 | 71.44 |
|            |                        |       |       |       |       |       |       |       |       |       |       |       |       |
| <b>90</b>  | Optimal dose (g)       | 1.7   | 1.95  | 1.8   | 1.95  | 1.9   | 1.95  | 1.95  | 2     | 2.05  | 2     | 2.1   | 2     |
|            | Target attainment (%)  | 92.01 | 90.08 | 92.01 | 90.08 | 92.01 | 90.08 | 92.01 | 90.08 | 92.01 | 90.08 | 92.01 | 90.08 |
|            | Cmin 24 ≤ 2.5 mg/L (%) | 53.47 | 45.79 | 50.18 | 38.28 | 38.28 | 38.28 | 38.28 | 38.28 | 28.61 | 28.61 | 25.59 | 28.61 |
|            | Cmin 48 ≤ 2.5 mg/L (%) | 92.07 | 86.13 | 87.77 | 86.13 | 83.68 | 83.68 | 81.15 | 77.19 | 75.5  | 77.19 | 71.44 | 71.44 |
|            |                        |       |       |       |       |       |       |       |       |       |       |       |       |
| <b>100</b> | Optimal dose (g)       | 1.75  | 2.1   | 1.8   | 2.1   | 1.9   | 2.1   | 1.95  | 2.15  | 2.05  | 2.15  | 2.1   | 2.15  |



|            |                        |       |       |       |       |       |       |       |       |       |       |       |       |
|------------|------------------------|-------|-------|-------|-------|-------|-------|-------|-------|-------|-------|-------|-------|
|            | Target attainment (%)  | 92.01 | 92.25 | 92.01 | 90.08 | 92.01 | 90.08 | 92.01 | 90.08 | 92.01 | 90.08 | 92.01 | 90.08 |
|            | Cmin 24 ≤ 2.5 mg/L (%) | 63.27 | 58.92 | 61.09 | 50.18 | 53.47 | 50.18 | 50.18 | 41.42 | 41.42 | 41.42 | 41.42 | 41.42 |
|            | Cmin 48 ≤ 2.5 mg/L (%) | 92.99 | 92.07 | 92.99 | 87.77 | 92.07 | 87.77 | 92.07 | 86.13 | 86.13 | 83.68 | 83.68 | 83.68 |
| <b>110</b> | Optimal dose (g)       | 1.75  | 2.25  | 1.85  | 2.25  | 1.9   | 2.3   | 2     | 2.3   | 2.05  | 2.3   | 2.15  | 2.3   |
|            | Target attainment (%)  | 92.01 | 92.25 | 92.01 | 92.25 | 92.01 | 92.25 | 92.01 | 92.25 | 92.01 | 90.08 | 92.01 | 90.08 |
|            | Cmin 24 ≤ 2.5 mg/L (%) | 64.62 | 61.09 | 64.62 | 61.09 | 63.35 | 53.47 | 61.09 | 50.18 | 53.47 | 50.18 | 50.18 | 47.14 |
|            | Cmin 48 ≤ 2.5 mg/L (%) | 92.99 | 92.99 | 92.99 | 92.07 | 92.99 | 92.07 | 92.99 | 92.07 | 92.07 | 87.77 | 92.07 | 87.77 |
| <b>120</b> | Optimal dose (g)       | 1.75  | 2.4   | 1.85  | 2.4   | 1.9   | 2.45  | 2     | 2.45  | 2.05  | 2.45  | 2.15  | 2.45  |
|            | Target attainment (%)  | 92.01 | 92.25 | 92.01 | 92.25 | 92.01 | 92.25 | 92.01 | 92.25 | 92.01 | 92.25 | 92.01 | 90.08 |
|            | Cmin 24 ≤ 2.5 mg/L (%) | 64.62 | 63.27 | 64.62 | 62.36 | 64.62 | 61.09 | 64.62 | 58.92 | 63.35 | 53.47 | 60.27 | 50.18 |
|            | Cmin 48 ≤ 2.5 mg/L (%) | 94.47 | 92.99 | 92.99 | 92.99 | 92.99 | 92.99 | 92.99 | 92.07 | 92.99 | 92.07 | 92.07 | 92.07 |
| <b>130</b> | Optimal dose (g)       | 1.8   | 2.55  | 1.85  | 2.6   | 1.95  | 2.6   | 2     | 2.6   | 2.1   | 2.6   | 2.15  | 2.6   |
|            | Target attainment (%)  | 92.01 | 92.25 | 92.01 | 92.25 | 92.01 | 92.25 | 92.01 | 92.25 | 92.01 | 92.25 | 92.01 | 92.25 |
|            | Cmin 24 ≤ 2.5 mg/L (%) | 70.44 | 64.62 | 64.62 | 64.62 | 64.62 | 64.62 | 64.62 | 62.44 | 64.62 | 62.44 | 64.62 | 58.92 |
|            | Cmin 48 ≤ 2.5 mg/L (%) | 94.47 | 92.99 | 94.47 | 92.99 | 94.47 | 92.99 | 92.99 | 92.99 | 92.99 | 92.07 | 92.99 | 92.07 |
| <b>140</b> | Optimal dose (g)       | 1.8   | 2.7   | 1.9   | 2.75  | 1.95  | 2.75  | 2.05  | 2.75  | 2.1   | 2.75  | 2.2   | 2.75  |
|            | Target attainment (%)  | 92.01 | 92.25 | 92.01 | 92.25 | 92.01 | 92.25 | 92.01 | 92.25 | 92.01 | 92.25 | 92.01 | 92.25 |
|            | Cmin 24 ≤ 2.5 mg/L (%) | 70.44 | 64.62 | 70.44 | 64.62 | 64.62 | 64.62 | 64.62 | 64.62 | 64.62 | 62.44 | 64.62 | 62.44 |
|            | Cmin 48 ≤ 2.5 mg/L (%) | 94.47 | 92.99 | 94.47 | 92.99 | 94.47 | 92.99 | 94.47 | 92.99 | 94.47 | 92.99 | 92.99 | 92.99 |
| <b>150</b> | Optimal dose (g)       | 1.8   | 2.85  | 1.9   | 2.9   | 1.95  | 2.9   | 2.05  | 2.9   | 2.1   | 2.9   | 2.2   | 2.9   |
|            | Target attainment (%)  | 92.01 | 92.25 | 92.01 | 92.25 | 92.01 | 92.25 | 92.01 | 92.25 | 92.01 | 92.25 | 92.01 | 92.25 |
|            | Cmin 24 ≤ 2.5 mg/L (%) | 77.08 | 64.62 | 70.44 | 64.62 | 70.44 | 64.62 | 70.44 | 64.62 | 64.62 | 64.62 | 64.62 | 63.71 |
|            | Cmin 48 ≤ 2.5 mg/L (%) | 96.83 | 92.99 | 94.47 | 92.99 | 94.47 | 92.99 | 94.47 | 92.99 | 94.47 | 92.99 | 94.47 | 92.99 |

|            |                        |       |       |       |       |       |       |       |       |       |       |       |       |
|------------|------------------------|-------|-------|-------|-------|-------|-------|-------|-------|-------|-------|-------|-------|
| <b>160</b> | Optimal dose (g)       | 1.85  | 3     | 1.9   | 3     | 2     | 3.05  | 2.05  | 3.05  | 2.15  | 3.05  | 2.2   | 3.05  |
|            | Target attainment (%)  | 92.01 | 92.25 | 92.01 | 92.25 | 92.01 | 92.25 | 92.01 | 92.25 | 92.01 | 92.25 | 92.01 | 92.25 |
|            | Cmin 24 ≤ 2.5 mg/L (%) | 78.44 | 70.44 | 77.08 | 64.62 | 74.41 | 64.62 | 70.44 | 64.62 | 70.44 | 64.62 | 64.62 | 64.62 |
|            | Cmin 48 ≤ 2.5 mg/L (%) | 96.83 | 92.99 | 96.83 | 92.99 | 96.83 | 92.99 | 94.47 | 92.99 | 94.47 | 92.99 | 94.47 | 92.99 |
| <b>170</b> | Optimal dose (g)       | 1.85  | 3.15  | 1.9   | 3.15  | 2     | 3.2   | 2.05  | 3.2   | 2.15  | 3.2   | 2.2   | 3.2   |
|            | Target attainment (%)  | 92.01 | 92.25 | 92.01 | 92.25 | 92.01 | 92.25 | 92.01 | 92.25 | 92.01 | 92.25 | 92.01 | 92.25 |
|            | Cmin 24 ≤ 2.5 mg/L (%) | 78.44 | 70.44 | 78.44 | 70.44 | 77.08 | 64.62 | 76.09 | 64.62 | 74.41 | 64.62 | 70.44 | 64.62 |
|            | Cmin 48 ≤ 2.5 mg/L (%) | 96.83 | 94.47 | 96.83 | 94.47 | 96.83 | 92.99 | 96.83 | 92.99 | 96.83 | 92.99 | 96.83 | 92.99 |
| <b>180</b> | Optimal dose (g)       | 1.85  | 3.3   | 1.95  | 3.3   | 2     | 3.3   | 2.1   | 3.35  | 2.15  | 3.35  | 2.25  | 3.35  |
|            | Target attainment (%)  | 92.01 | 92.25 | 92.01 | 92.25 | 92.01 | 92.25 | 92.01 | 92.25 | 92.01 | 92.25 | 92.01 | 92.25 |
|            | Cmin 24 ≤ 2.5 mg/L (%) | 83.68 | 70.44 | 78.44 | 70.44 | 78.44 | 70.44 | 77.08 | 64.62 | 76.09 | 64.62 | 74.41 | 64.62 |
|            | Cmin 48 ≤ 2.5 mg/L (%) | 96.83 | 94.47 | 96.83 | 94.47 | 96.83 | 94.47 | 96.83 | 94.47 | 96.83 | 94.47 | 96.83 | 94.47 |
| <b>190</b> | Optimal dose (g)       | 1.9   | 3.45  | 1.95  | 3.45  | 2.05  | 3.45  | 2.1   | 3.45  | 2.2   | 3.5   | 2.25  | 3.5   |
|            | Target attainment (%)  | 93.28 | 92.25 | 92.01 | 92.25 | 92.01 | 92.25 | 92.01 | 92.25 | 92.01 | 92.25 | 92.01 | 92.25 |
|            | Cmin 24 ≤ 2.5 mg/L (%) | 89.62 | 70.44 | 83.68 | 70.44 | 78.44 | 70.44 | 78.44 | 70.44 | 77.08 | 64.62 | 76.09 | 64.62 |
|            | Cmin 48 ≤ 2.5 mg/L (%) | 96.83 | 94.47 | 96.83 | 94.47 | 96.83 | 94.47 | 96.83 | 94.47 | 96.83 | 94.47 | 96.83 | 94.47 |
| <b>200</b> | Optimal dose (g)       | 1.9   | 3.6   | 1.95  | 3.6   | 2.05  | 3.6   | 2.1   | 3.6   | 2.2   | 3.6   | 2.25  | 3.65  |
|            | Target attainment (%)  | 93.28 | 92.25 | 92.01 | 92.25 | 92.01 | 92.25 | 92.01 | 92.25 | 92.01 | 92.25 | 92.01 | 92.25 |
|            | Cmin 24 ≤ 2.5 mg/L (%) | 92.07 | 74.41 | 89.62 | 70.44 | 80.97 | 70.44 | 78.44 | 70.44 | 78.44 | 70.44 | 78.44 | 70.44 |
|            | Cmin 48 ≤ 2.5 mg/L (%) | 96.83 | 94.47 | 96.83 | 94.47 | 96.83 | 94.47 | 96.83 | 94.47 | 96.83 | 94.47 | 96.83 | 94.47 |
| <b>210</b> | Optimal dose (g)       | 1.9   | 3.75  | 2     | 3.75  | 2.05  | 3.75  | 2.15  | 3.75  | 2.2   | 3.75  | 2.3   | 3.75  |
|            | Target attainment (%)  | 92.01 | 92.25 | 93.28 | 92.25 | 92.01 | 92.25 | 92.01 | 92.25 | 92.01 | 92.25 | 92.01 | 92.25 |
|            | Cmin 24 ≤ 2.5 mg/L (%) | 92.07 | 77.08 | 92.07 | 76.09 | 89.62 | 74.41 | 80.97 | 70.44 | 78.44 | 70.44 | 78.44 | 70.44 |

|            |                        |       |       |       |       |       |       |       |       |       |       |       |       |
|------------|------------------------|-------|-------|-------|-------|-------|-------|-------|-------|-------|-------|-------|-------|
|            | Cmin 48 ≤ 2.5 mg/L (%) | 99.28 | 94.47 | 96.83 | 94.47 | 96.83 | 94.47 | 96.83 | 94.47 | 96.83 | 94.47 | 96.83 | 94.47 |
| <b>220</b> | Optimal dose (g)       | 1.9   | 3.85  | 2     | 3.9   | 2.05  | 3.9   | 2.15  | 3.9   | 2.2   | 3.9   | 2.3   | 3.9   |
|            | Target attainment (%)  | 92.01 | 92.25 | 93.28 | 92.25 | 92.01 | 92.25 | 92.01 | 92.25 | 92.01 | 92.25 | 92.01 | 92.25 |
|            | Cmin 24 ≤ 2.5 mg/L (%) | 93.56 | 78.44 | 93.56 | 77.08 | 92.07 | 76.09 | 89.62 | 74.41 | 80.97 | 74.41 | 78.44 | 70.44 |
|            | Cmin 48 ≤ 2.5 mg/L (%) | 100   | 94.47 | 99.28 | 94.47 | 99.28 | 94.47 | 96.83 | 94.47 | 96.83 | 94.47 | 96.83 | 94.47 |
| <b>230</b> | Optimal dose (g)       | 1.95  | 4     | 2     | 4     | 2.1   | 4.05  | 2.15  | 4.05  | 2.25  | 4.05  | 2.3   | 4.05  |
|            | Target attainment (%)  | 93.28 | 92.25 | 92.01 | 92.25 | 93.28 | 92.25 | 92.01 | 92.25 | 92.01 | 92.25 | 92.01 | 92.25 |
|            | Cmin 24 ≤ 2.5 mg/L (%) | 93.56 | 78.44 | 93.56 | 78.44 | 93.56 | 77.08 | 92.07 | 76.09 | 87.99 | 74.41 | 80.97 | 74.41 |
|            | Cmin 48 ≤ 2.5 mg/L (%) | 100   | 96.83 | 100   | 96.83 | 99.28 | 94.47 | 99.28 | 94.47 | 96.83 | 94.47 | 96.83 | 94.47 |
| <b>240</b> | Optimal dose (g)       | 1.95  | 4.15  | 2.05  | 4.15  | 2.1   | 4.15  | 2.2   | 4.15  | 2.25  | 4.2   | 2.35  | 4.2   |
|            | Target attainment (%)  | 93.28 | 92.25 | 93.28 | 92.25 | 92.01 | 92.25 | 93.28 | 92.25 | 92.01 | 92.25 | 92.01 | 92.25 |
|            | Cmin 24 ≤ 2.5 mg/L (%) | 94.47 | 78.44 | 93.56 | 78.44 | 93.56 | 78.44 | 93.56 | 77.08 | 89.62 | 76.09 | 87.99 | 74.41 |
|            | Cmin 48 ≤ 2.5 mg/L (%) | 100   | 96.83 | 100   | 96.83 | 100   | 96.83 | 100   | 96.83 | 99.28 | 94.47 | 96.83 | 94.47 |
| <b>250</b> | Optimal dose (g)       | 1.95  | 4.3   | 2.05  | 4.3   | 2.1   | 4.3   | 2.2   | 4.3   | 2.25  | 4.3   | 2.35  | 4.3   |
|            | Target attainment (%)  | 93.28 | 92.25 | 93.28 | 92.25 | 92.01 | 92.25 | 93.28 | 92.25 | 92.01 | 92.25 | 92.01 | 92.25 |
|            | Cmin 24 ≤ 2.5 mg/L (%) | 94.47 | 80.97 | 94.47 | 78.44 | 93.56 | 78.44 | 93.56 | 78.44 | 93.56 | 77.08 | 89.62 | 76.09 |
|            | Cmin 48 ≤ 2.5 mg/L (%) | 100   | 96.83 | 100   | 96.83 | 100   | 96.83 | 100   | 96.83 | 100   | 96.83 | 99.28 | 96.83 |

**Table S3: Optimal initial amikacin dosing recommendations based on CLCG and BSA with associated efficacy and safety target attainment rates assuming a MIC value of 2 mg/L**

Abbreviations: BSA, Body Surface Area; CLCG, Creatinine clearance estimated by Cockcroft & Gault equation; MIC, bacterial minimal inhibitory concentration; C<sub>max</sub>/MIC ≥ 8, probability of amikacin maximal plasma concentration over MIC ratio ≥ 8, AUC/MIC ≥ 75, probability of amikacin daily area under the curve over MIC ratio ≥ 75; C<sub>min</sub> 24 ≤ 2.5 mg/L, amikacin plasma concentration at 24h ≤ 2.5 mg/L probability; C<sub>min</sub> 48, amikacin plasma concentration at 48h ≤ 2.5 mg/L probability.

The maximal dose was capped to 5 g.

|              | BSA (m <sup>2</sup> )              | 1.5                       |              | 1.6                       |              | 1.7                       |              | 1.8                       |              | 1.9                       |              |
|--------------|------------------------------------|---------------------------|--------------|---------------------------|--------------|---------------------------|--------------|---------------------------|--------------|---------------------------|--------------|
| CLCG(mL/min) | Targeted index                     | C <sub>max</sub> /MIC ≥ 8 | AUC/MIC ≥ 75 | C <sub>max</sub> /MIC ≥ 8 | AUC/MIC ≥ 75 | C <sub>max</sub> /MIC ≥ 8 | AUC/MIC ≥ 75 | C <sub>max</sub> /MIC ≥ 8 | AUC/MIC ≥ 75 | C <sub>max</sub> /MIC ≥ 8 | AUC/MIC ≥ 75 |
| <b>10</b>    | Optimal dose (g)                   | 0.6                       | 0.5          | 0.65                      | 0.5          | 0.7                       | 0.5          | 0.75                      | 0.5          | 0.75                      | 0.5          |
|              | Target attainment (%)              | 92.01                     | 99.09        | 92.01                     | 99.09        | 92.01                     | 99.09        | 92.01                     | 99.09        | 92.01                     | 96.38        |
|              | C <sub>min</sub> 24 ≤ 2.5 mg/L (%) | 1.81                      | 1.81         | 1.81                      | 1.81         | 0                         | 1.81         | 0                         | 1.81         | 0                         | 1.81         |
|              | C <sub>min</sub> 48 ≤ 2.5 mg/L (%) | 3.93                      | 6.84         | 1.81                      | 6.84         | 1.81                      | 6.84         | 1.81                      | 7.75         | 1.81                      | 4.84         |
| <b>20</b>    | Optimal dose (g)                   | 0.65                      | 0.5          | 0.65                      | 0.5          | 0.7                       | 0.5          | 0.75                      | 0.5          | 0.8                       | 0.5          |
|              | Target attainment (%)              | 92.01                     | 97.28        | 92.01                     | 97.28        | 92.01                     | 92.44        | 92.01                     | 90.27        | 92.01                     | 90.27        |
|              | C <sub>min</sub> 24 ≤ 2.5 mg/L (%) | 1.81                      | 1.81         | 1.81                      | 1.81         | 1.81                      | 1.81         | 1.81                      | 1.81         | 1.81                      | 1.81         |
|              | C <sub>min</sub> 48 ≤ 2.5 mg/L (%) | 19.45                     | 58.89        | 19.45                     | 58.89        | 18.18                     | 58.89        | 14.21                     | 58.89        | 11.2                      | 58.89        |
| <b>30</b>    | Optimal dose (g)                   | 0.65                      | 0.5          | 0.65                      | 0.5          | 0.7                       | 0.55         | 0.75                      | 0.55         | 0.8                       | 0.55         |
|              | Target attainment (%)              | 92.01                     | 92.98        | 92.01                     | 90.27        | 92.01                     | 92.98        | 92.01                     | 90.27        | 92.01                     | 90.27        |
|              | C <sub>min</sub> 24 ≤ 2.5 mg/L (%) | 10.29                     | 14.21        | 10.29                     | 14.21        | 6.84                      | 10.29        | 4.72                      | 10.29        | 1.81                      | 10.29        |
|              | C <sub>min</sub> 48 ≤ 2.5 mg/L (%) | 65.99                     | 77.52        | 65.99                     | 77.52        | 63.27                     | 74.15        | 63.27                     | 74.15        | 60.13                     | 73.16        |
| <b>40</b>    | Optimal dose (g)                   | 0.65                      | 0.55         | 0.7                       | 0.6          | 0.7                       | 0.6          | 0.75                      | 0.6          | 0.8                       | 0.6          |
|              | Target attainment (%)              | 92.01                     | 92.98        | 92.01                     | 92.98        | 92.01                     | 92.98        | 92.01                     | 90.27        | 92.01                     | 90.27        |
|              | C <sub>min</sub> 24 ≤ 2.5 mg/L (%) | 40.98                     | 53.44        | 13.3                      | 43.15        | 13.3                      | 40.98        | 10.29                     | 29.52        | 10.29                     | 29.52        |
|              | C <sub>min</sub> 48 ≤ 2.5 mg/L (%) | 81.41                     | 92.99        | 76.6                      | 88.69        | 74.15                     | 84.72        | 74.15                     | 84.72        | 73.16                     | 83.09        |

|            |                        |       |       |       |       |       |       |       |       |       |       |
|------------|------------------------|-------|-------|-------|-------|-------|-------|-------|-------|-------|-------|
| <b>50</b>  | Optimal dose (g)       | 0.65  | 0.65  | 0.7   | 0.65  | 0.75  | 0.65  | 0.75  | 0.65  | 0.8   | 0.7   |
|            | Target attainment (%)  | 92.01 | 92.98 | 92.01 | 92.98 | 92.01 | 92.98 | 92.01 | 90.08 | 92.01 | 92.98 |
|            | Cmin 24 ≤ 2.5 mg/L (%) | 63.27 | 63.27 | 63.27 | 63.27 | 48.87 | 63.27 | 40.98 | 63.27 | 28.61 | 43.15 |
|            | Cmin 48 ≤ 2.5 mg/L (%) | 92.99 | 92.99 | 92.99 | 92.99 | 88.69 | 92.99 | 88.69 | 92.99 | 86.13 | 92.99 |
| <b>60</b>  | Optimal dose (g)       | 0.65  | 0.7   | 0.7   | 0.75  | 0.75  | 0.75  | 0.75  | 0.75  | 0.8   | 0.75  |
|            | Target attainment (%)  | 92.01 | 90.08 | 92.01 | 95.16 | 92.01 | 95.16 | 92.01 | 92.98 | 92.01 | 92.98 |
|            | Cmin 24 ≤ 2.5 mg/L (%) | 64.62 | 64.62 | 64.62 | 63.27 | 63.27 | 63.27 | 63.27 | 63.27 | 63.27 | 63.27 |
|            | Cmin 48 ≤ 2.5 mg/L (%) | 92.99 | 92.99 | 92.99 | 92.99 | 92.99 | 92.99 | 92.99 | 92.99 | 92.99 | 92.99 |
| <b>70</b>  | Optimal dose (g)       | 0.65  | 0.8   | 0.7   | 0.8   | 0.75  | 0.8   | 0.8   | 0.8   | 0.8   | 0.85  |
|            | Target attainment (%)  | 92.01 | 92.25 | 92.01 | 90.08 | 92.01 | 90.08 | 92.01 | 90.08 | 92.01 | 95.16 |
|            | Cmin 24 ≤ 2.5 mg/L (%) | 70.44 | 64.62 | 70.44 | 64.62 | 64.62 | 64.62 | 64.62 | 64.62 | 64.62 | 64.62 |
|            | Cmin 48 ≤ 2.5 mg/L (%) | 94.47 | 94.47 | 94.47 | 92.99 | 94.47 | 92.99 | 92.99 | 92.99 | 92.99 | 92.99 |
| <b>80</b>  | Optimal dose (g)       | 0.7   | 0.9   | 0.7   | 0.9   | 0.75  | 0.9   | 0.8   | 0.9   | 0.85  | 0.9   |
|            | Target attainment (%)  | 93.28 | 92.25 | 92.01 | 92.25 | 92.01 | 92.25 | 92.01 | 92.25 | 92.01 | 90.08 |
|            | Cmin 24 ≤ 2.5 mg/L (%) | 79.8  | 70.44 | 75.4  | 70.44 | 70.44 | 64.62 | 70.44 | 64.62 | 64.62 | 64.62 |
|            | Cmin 48 ≤ 2.5 mg/L (%) | 96.83 | 94.47 | 96.83 | 94.47 | 94.47 | 94.47 | 94.47 | 94.47 | 94.47 | 94.47 |
| <b>90</b>  | Optimal dose (g)       | 0.7   | 0.95  | 0.7   | 0.95  | 0.75  | 1     | 0.8   | 1     | 0.85  | 1     |
|            | Target attainment (%)  | 93.28 | 92.25 | 92.01 | 92.25 | 92.01 | 95.16 | 92.01 | 92.25 | 92.01 | 92.25 |
|            | Cmin 24 ≤ 2.5 mg/L (%) | 83.68 | 71.44 | 83.68 | 70.44 | 81.15 | 70.44 | 70.44 | 70.44 | 70.44 | 64.62 |
|            | Cmin 48 ≤ 2.5 mg/L (%) | 96.83 | 94.47 | 96.83 | 94.47 | 96.83 | 94.47 | 96.83 | 94.47 | 94.47 | 94.47 |
| <b>100</b> | Optimal dose (g)       | 0.7   | 1.05  | 0.75  | 1.05  | 0.75  | 1.05  | 0.8   | 1.05  | 0.85  | 1.05  |
|            | Target attainment (%)  | 93.28 | 92.25 | 93.28 | 92.25 | 92.01 | 92.25 | 92.01 | 92.25 | 92.01 | 92.25 |
|            | Cmin 24 ≤ 2.5 mg/L (%) | 92.07 | 77.08 | 87.77 | 71.44 | 83.68 | 70.44 | 81.15 | 70.44 | 77.08 | 70.44 |
|            | Cmin 48 ≤ 2.5 mg/L (%) | 96.83 | 96.83 | 96.83 | 96.83 | 96.83 | 94.47 | 96.83 | 94.47 | 96.83 | 94.47 |
| <b>110</b> | Optimal dose (g)       | 0.7   | 1.1   | 0.75  | 1.15  | 0.8   | 1.15  | 0.8   | 1.15  | 0.85  | 1.15  |
|            | Target attainment (%)  | 93.28 | 92.25 | 93.28 | 92.25 | 93.28 | 92.25 | 92.01 | 92.25 | 92.01 | 92.25 |
|            | Cmin 24 ≤ 2.5 mg/L (%) | 92.99 | 81.15 | 92.07 | 77.7  | 92.07 | 77.08 | 83.68 | 74.41 | 81.15 | 70.44 |

|            |                        |       |       |       |       |       |       |       |       |       |       |
|------------|------------------------|-------|-------|-------|-------|-------|-------|-------|-------|-------|-------|
|            | Cmin 48 ≤ 2.5 mg/L (%) | 100   | 96.83 | 99.28 | 96.83 | 96.83 | 96.83 | 96.83 | 96.83 | 96.83 | 96.83 |
| <b>120</b> | Optimal dose (g)       | 0.7   | 1.2   | 0.75  | 1.2   | 0.8   | 1.2   | 0.8   | 1.2   | 0.85  | 1.2   |
|            | Target attainment (%)  | 92.01 | 92.25 | 93.28 | 92.25 | 93.28 | 92.25 | 92.01 | 92.25 | 92.01 | 92.25 |
|            | Cmin 24 ≤ 2.5 mg/L (%) | 94.47 | 83.68 | 94.47 | 81.15 | 92.07 | 78.44 | 92.07 | 77.7  | 92.07 | 77.08 |
|            | Cmin 48 ≤ 2.5 mg/L (%) | 100   | 96.83 | 100   | 96.83 | 99.28 | 96.83 | 99.28 | 96.83 | 96.83 | 96.83 |
| <b>130</b> | Optimal dose (g)       | 0.7   | 1.3   | 0.75  | 1.3   | 0.8   | 1.3   | 0.85  | 1.3   | 0.85  | 1.3   |
|            | Target attainment (%)  | 92.01 | 92.25 | 93.28 | 92.25 | 93.28 | 92.25 | 93.28 | 92.25 | 92.01 | 92.25 |
|            | Cmin 24 ≤ 2.5 mg/L (%) | 94.47 | 85.32 | 94.47 | 83.68 | 94.47 | 78.44 | 92.07 | 78.44 | 92.07 | 78.44 |
|            | Cmin 48 ≤ 2.5 mg/L (%) | 100   | 96.83 | 100   | 96.83 | 100   | 96.83 | 100   | 96.83 | 100   | 96.83 |
| <b>140</b> | Optimal dose (g)       | 0.7   | 1.35  | 0.75  | 1.35  | 0.8   | 1.35  | 0.85  | 1.35  | 0.9   | 1.35  |
|            | Target attainment (%)  | 92.01 | 92.25 | 92.01 | 92.25 | 93.28 | 92.25 | 93.28 | 92.25 | 93.28 | 92.25 |
|            | Cmin 24 ≤ 2.5 mg/L (%) | 96.83 | 92.07 | 94.47 | 89.62 | 94.47 | 83.68 | 94.47 | 81.15 | 94.47 | 78.44 |
|            | Cmin 48 ≤ 2.5 mg/L (%) | 100   | 96.83 | 100   | 96.83 | 100   | 96.83 | 100   | 96.83 | 100   | 96.83 |
| <b>150</b> | Optimal dose (g)       | 0.75  | 1.45  | 0.75  | 1.45  | 0.8   | 1.45  | 0.85  | 1.45  | 0.9   | 1.45  |
|            | Target attainment (%)  | 93.28 | 92.25 | 92.01 | 92.25 | 92.01 | 92.25 | 93.28 | 92.25 | 93.28 | 92.25 |
|            | Cmin 24 ≤ 2.5 mg/L (%) | 96.83 | 92.07 | 96.83 | 92.07 | 94.47 | 89.62 | 94.47 | 83.68 | 94.47 | 81.15 |
|            | Cmin 48 ≤ 2.5 mg/L (%) | 100   | 96.83 | 100   | 96.83 | 100   | 96.83 | 100   | 96.83 | 100   | 96.83 |
| <b>160</b> | Optimal dose (g)       | 0.75  | 1.5   | 0.8   | 1.5   | 0.8   | 1.5   | 0.85  | 1.5   | 0.9   | 1.5   |
|            | Target attainment (%)  | 93.28 | 92.25 | 93.28 | 92.25 | 92.01 | 92.25 | 93.28 | 92.25 | 93.28 | 92.25 |
|            | Cmin 24 ≤ 2.5 mg/L (%) | 96.83 | 92.07 | 96.83 | 92.07 | 96.83 | 92.07 | 96.83 | 89.62 | 94.47 | 83.68 |
|            | Cmin 48 ≤ 2.5 mg/L (%) | 100   | 96.83 | 100   | 96.83 | 100   | 96.83 | 100   | 96.83 | 100   | 96.83 |
| <b>170</b> | Optimal dose (g)       | 0.75  | 1.55  | 0.8   | 1.6   | 0.8   | 1.6   | 0.85  | 1.6   | 0.9   | 1.6   |
|            | Target attainment (%)  | 93.28 | 92.25 | 93.28 | 92.25 | 92.01 | 92.25 | 92.01 | 92.25 | 93.28 | 92.25 |
|            | Cmin 24 ≤ 2.5 mg/L (%) | 96.83 | 92.99 | 96.83 | 92.07 | 96.83 | 92.07 | 96.83 | 92.07 | 96.83 | 89.62 |
|            | Cmin 48 ≤ 2.5 mg/L (%) | 100   | 99.28 | 100   | 96.83 | 100   | 96.83 | 100   | 96.83 | 100   | 96.83 |
| <b>180</b> | Optimal dose (g)       | 0.75  | 1.65  | 0.8   | 1.65  | 0.85  | 1.65  | 0.85  | 1.65  | 0.9   | 1.65  |
|            | Target attainment (%)  | 93.28 | 92.25 | 93.28 | 92.25 | 93.28 | 92.25 | 92.01 | 92.25 | 93.28 | 92.25 |

|            |                        |       |       |       |       |       |       |       |       |       |       |
|------------|------------------------|-------|-------|-------|-------|-------|-------|-------|-------|-------|-------|
|            | Cmin 24 ≤ 2.5 mg/L (%) | 96.83 | 92.99 | 96.83 | 92.07 | 96.83 | 92.07 | 96.83 | 92.07 | 96.83 | 92.07 |
|            | Cmin 48 ≤ 2.5 mg/L (%) | 100   | 99.28 | 100   | 99.28 | 100   | 96.83 | 100   | 96.83 | 100   | 96.83 |
| <b>190</b> | Optimal dose (g)       | 0.75  | 1.7   | 0.8   | 1.7   | 0.85  | 1.7   | 0.9   | 1.75  | 0.9   | 1.75  |
|            | Target attainment (%)  | 91.47 | 92.25 | 93.28 | 92.25 | 93.28 | 92.25 | 93.28 | 92.25 | 92.01 | 92.25 |
|            | Cmin 24 ≤ 2.5 mg/L (%) | 96.83 | 94.47 | 96.83 | 94.47 | 96.83 | 92.07 | 96.83 | 92.07 | 96.83 | 92.07 |
|            | Cmin 48 ≤ 2.5 mg/L (%) | 100   | 100   | 100   | 99.28 | 100   | 99.28 | 100   | 99.28 | 100   | 96.83 |
| <b>200</b> | Optimal dose (g)       | 0.75  | 1.8   | 0.8   | 1.8   | 0.85  | 1.8   | 0.9   | 1.8   | 0.9   | 1.8   |
|            | Target attainment (%)  | 91.47 | 92.25 | 93.28 | 92.25 | 93.28 | 92.25 | 93.28 | 92.25 | 92.01 | 92.25 |
|            | Cmin 24 ≤ 2.5 mg/L (%) | 96.83 | 94.47 | 96.83 | 94.47 | 96.83 | 94.47 | 96.83 | 93.56 | 96.83 | 92.07 |
|            | Cmin 48 ≤ 2.5 mg/L (%) | 100   | 100   | 100   | 100   | 100   | 99.28 | 100   | 99.28 | 100   | 99.28 |
| <b>210</b> | Optimal dose (g)       | 0.8   | 1.85  | 0.8   | 1.85  | 0.85  | 1.85  | 0.9   | 1.85  | 0.95  | 1.85  |
|            | Target attainment (%)  | 92.39 | 92.25 | 91.47 | 92.25 | 93.28 | 92.25 | 93.28 | 92.25 | 93.28 | 92.25 |
|            | Cmin 24 ≤ 2.5 mg/L (%) | 96.83 | 94.47 | 96.83 | 94.47 | 96.83 | 94.47 | 96.83 | 94.47 | 96.83 | 93.56 |
|            | Cmin 48 ≤ 2.5 mg/L (%) | 100   | 100   | 100   | 100   | 100   | 100   | 100   | 100   | 100   | 100   |
| <b>220</b> | Optimal dose (g)       | 0.8   | 1.9   | 0.8   | 1.95  | 0.85  | 1.95  | 0.9   | 1.95  | 0.95  | 1.95  |
|            | Target attainment (%)  | 92.39 | 92.25 | 91.47 | 92.25 | 91.47 | 92.25 | 93.28 | 92.25 | 93.28 | 92.25 |
|            | Cmin 24 ≤ 2.5 mg/L (%) | 100   | 94.47 | 96.83 | 94.47 | 96.83 | 94.47 | 96.83 | 94.47 | 96.83 | 93.56 |
|            | Cmin 48 ≤ 2.5 mg/L (%) | 100   | 100   | 100   | 100   | 100   | 100   | 100   | 100   | 100   | 100   |
| <b>230</b> | Optimal dose (g)       | 0.8   | 2     | 0.85  | 2     | 0.85  | 2     | 0.9   | 2     | 0.95  | 2     |
|            | Target attainment (%)  | 92.39 | 92.25 | 92.39 | 92.25 | 91.47 | 92.25 | 93.28 | 92.25 | 93.28 | 92.25 |
|            | Cmin 24 ≤ 2.5 mg/L (%) | 100   | 94.47 | 97.55 | 94.47 | 96.83 | 94.47 | 96.83 | 94.47 | 96.83 | 94.47 |
|            | Cmin 48 ≤ 2.5 mg/L (%) | 100   | 100   | 100   | 100   | 100   | 100   | 100   | 100   | 100   | 100   |
| <b>240</b> | Optimal dose (g)       | 0.8   | 2.05  | 0.85  | 2.05  | 0.9   | 2.05  | 0.9   | 2.05  | 0.95  | 2.1   |
|            | Target attainment (%)  | 92.39 | 92.25 | 92.39 | 92.25 | 92.39 | 92.25 | 91.47 | 92.25 | 93.28 | 92.25 |
|            | Cmin 24 ≤ 2.5 mg/L (%) | 100   | 94.47 | 100   | 94.47 | 96.83 | 94.47 | 96.83 | 94.47 | 96.83 | 94.47 |
|            | Cmin 48 ≤ 2.5 mg/L (%) | 100   | 100   | 100   | 100   | 100   | 100   | 100   | 100   | 100   | 100   |
| <b>250</b> | Optimal dose (g)       | 0.8   | 2.1   | 0.85  | 2.15  | 0.9   | 2.15  | 0.9   | 2.15  | 0.95  | 2.15  |

|                        |       |       |       |       |       |       |       |       |       |       |
|------------------------|-------|-------|-------|-------|-------|-------|-------|-------|-------|-------|
| Target attainment (%)  | 92.39 | 92.25 | 92.39 | 92.25 | 92.39 | 92.25 | 91.47 | 92.25 | 91.47 | 92.25 |
| Cmin 24 ≤ 2.5 mg/L (%) | 100   | 94.47 | 100   | 94.47 | 100   | 94.47 | 97.55 | 94.47 | 96.83 | 94.47 |
| Cmin 48 ≤ 2.5 mg/L (%) | 100   | 100   | 100   | 100   | 100   | 100   | 100   | 100   | 100   | 100   |

Table S3 continued

| CLCG(mL/min) | BSA (m2)               | 2            |              | 2.1          |              | 2.2          |              | 2.3          |              | 2.4          |              | 2.5          |              |
|--------------|------------------------|--------------|--------------|--------------|--------------|--------------|--------------|--------------|--------------|--------------|--------------|--------------|--------------|
|              |                        | Cmax/MIC ≥ 8 | AUC/MIC ≥ 75 |
| <b>10</b>    | Optimal dose (g)       | 0.8          | 0.5          | 0.85         | 0.5          | 0.9          | 0.5          | 0.9          | 0.5          | 0.95         | 0.55         | 1            | 0.55         |
|              | Target attainment (%)  | 92.01        | 96.38        | 92.01        | 96.38        | 92.01        | 94.2         | 92.01        | 93.28        | 92.01        | 96.38        | 92.01        | 93.28        |
|              | Cmin 24 ≤ 2.5 mg/L (%) | 0            | 1.81         | 0            | 1.81         | 0            | 1.81         | 0            | 1.81         | 0            | 0            | 0            | 0            |
|              | Cmin 48 ≤ 2.5 mg/L (%) | 1.81         | 4.84         | 1.81         | 4.84         | 1.81         | 4.84         | 1.81         | 4.84         | 1.81         | 1.81         | 1.81         | 2.72         |
| <b>20</b>    | Optimal dose (g)       | 0.8          | 0.5          | 0.85         | 0.55         | 0.9          | 0.55         | 0.95         | 0.55         | 0.95         | 0.6          | 1            | 0.6          |
|              | Target attainment (%)  | 92.01        | 90.27        | 92.01        | 90.27        | 92.01        | 90.27        | 92.01        | 90.27        | 92.01        | 90.27        | 92.01        | 90.27        |
|              | Cmin 24 ≤ 2.5 mg/L (%) | 1.81         | 1.81         | 1.81         | 1.81         | 1.81         | 1.81         | 1.81         | 1.81         | 1.81         | 1.81         | 1.81         | 1.81         |
|              | Cmin 48 ≤ 2.5 mg/L (%) | 10.29        | 58.89        | 10.29        | 49.98        | 10.29        | 41.23        | 10.29        | 41.23        | 10.29        | 19.45        | 6.84         | 19.45        |
| <b>30</b>    | Optimal dose (g)       | 0.85         | 0.6          | 0.85         | 0.6          | 0.9          | 0.6          | 0.95         | 0.6          | 1            | 0.65         | 1            | 0.65         |
|              | Target attainment (%)  | 92.01        | 92.44        | 92.01        | 90.27        | 92.01        | 90.27        | 92.01        | 90.27        | 92.01        | 90.27        | 92.01        | 90.27        |
|              | Cmin 24 ≤ 2.5 mg/L (%) | 1.81         | 6.84         | 1.81         | 6.84         | 1.81         | 6.84         | 1.81         | 6.84         | 1.81         | 1.81         | 1.81         | 1.81         |
|              | Cmin 48 ≤ 2.5 mg/L (%) | 58.89        | 65.99        | 58.89        | 65.99        | 53.44        | 65.99        | 39.96        | 65.99        | 18.18        | 63.27        | 16           | 63.27        |
| <b>40</b>    | Optimal dose (g)       | 0.85         | 0.65         | 0.85         | 0.65         | 0.9          | 0.65         | 0.95         | 0.7          | 1            | 0.7          | 1.05         | 0.7          |
|              | Target attainment (%)  | 92.01        | 92.98        | 92.01        | 90.27        | 92.01        | 90.27        | 92.01        | 90.27        | 92.01        | 90.27        | 92.01        | 90.27        |
|              | Cmin 24 ≤ 2.5 mg/L (%) | 10.29        | 10.29        | 10.29        | 10.29        | 6.84         | 10.29        | 4.72         | 10.29        | 1.81         | 10.29        | 1.81         | 10.29        |



|            |                        |       |       |       |       |       |       |       |       |       |       |       |       |
|------------|------------------------|-------|-------|-------|-------|-------|-------|-------|-------|-------|-------|-------|-------|
|            | Cmin 48 ≤ 2.5 mg/L (%) | 64.62 | 74.15 | 64.62 | 74.15 | 63.27 | 74.15 | 63.27 | 74.15 | 63.27 | 73.16 | 63.27 | 73.16 |
| <b>50</b>  | Optimal dose (g)       | 0.85  | 0.7   | 0.9   | 0.7   | 0.9   | 0.7   | 0.95  | 0.75  | 1     | 0.75  | 1.05  | 0.75  |
|            | Target attainment (%)  | 92.01 | 92.98 | 92.01 | 92.98 | 92.01 | 90.27 | 92.01 | 92.98 | 92.01 | 90.27 | 92.01 | 90.27 |
|            | Cmin 24 ≤ 2.5 mg/L (%) | 16.5  | 40.98 | 10.29 | 40.98 | 10.29 | 29.52 | 10.29 | 17.41 | 10.29 | 17.41 | 10.29 | 14.39 |
|            | Cmin 48 ≤ 2.5 mg/L (%) | 75.5  | 92.99 | 74.15 | 88.69 | 74.15 | 88.69 | 73.16 | 86.13 | 70.44 | 86.13 | 64.62 | 86.13 |
| <b>60</b>  | Optimal dose (g)       | 0.85  | 0.75  | 0.9   | 0.75  | 0.95  | 0.8   | 0.95  | 0.8   | 1     | 0.8   | 1.05  | 0.8   |
|            | Target attainment (%)  | 92.01 | 90.08 | 92.01 | 90.08 | 92.01 | 92.98 | 92.01 | 92.98 | 92.01 | 92.98 | 92.01 | 90.27 |
|            | Cmin 24 ≤ 2.5 mg/L (%) | 53.26 | 63.27 | 44.12 | 63.27 | 28.61 | 52.01 | 28.61 | 46.29 | 13.48 | 44.12 | 13.48 | 42.33 |
|            | Cmin 48 ≤ 2.5 mg/L (%) | 92.99 | 92.99 | 88.69 | 92.99 | 86.13 | 92.99 | 86.13 | 92.99 | 81.15 | 92.99 | 74.15 | 92.99 |
| <b>70</b>  | Optimal dose (g)       | 0.85  | 0.85  | 0.9   | 0.85  | 0.95  | 0.85  | 0.95  | 0.85  | 1     | 0.85  | 1.05  | 0.9   |
|            | Target attainment (%)  | 92.01 | 92.98 | 92.01 | 92.98 | 92.01 | 92.98 | 92.01 | 92.98 | 92.01 | 90.08 | 92.01 | 92.98 |
|            | Cmin 24 ≤ 2.5 mg/L (%) | 64.62 | 64.62 | 63.27 | 64.62 | 56.55 | 63.27 | 53.26 | 63.27 | 44.12 | 63.27 | 41.42 | 53.26 |
|            | Cmin 48 ≤ 2.5 mg/L (%) | 92.99 | 92.99 | 92.99 | 92.99 | 92.99 | 92.99 | 92.99 | 92.99 | 92.99 | 92.99 | 87.77 | 92.99 |
| <b>80</b>  | Optimal dose (g)       | 0.85  | 0.9   | 0.9   | 0.9   | 0.95  | 0.9   | 1     | 0.9   | 1     | 0.95  | 1.05  | 0.95  |
|            | Target attainment (%)  | 92.01 | 90.08 | 92.01 | 90.08 | 92.01 | 90.08 | 92.01 | 90.08 | 92.01 | 92.98 | 92.01 | 92.98 |
|            | Cmin 24 ≤ 2.5 mg/L (%) | 64.62 | 64.62 | 64.62 | 64.62 | 64.62 | 64.62 | 64.62 | 64.62 | 64.62 | 64.62 | 56.55 | 64.62 |
|            | Cmin 48 ≤ 2.5 mg/L (%) | 94.47 | 94.47 | 92.99 | 92.99 | 92.99 | 92.99 | 92.99 | 92.99 | 92.99 | 92.99 | 92.99 | 92.99 |
| <b>90</b>  | Optimal dose (g)       | 0.85  | 1     | 0.9   | 1     | 0.95  | 1     | 1     | 1     | 1.05  | 1     | 1.05  | 1     |
|            | Target attainment (%)  | 92.01 | 92.25 | 92.01 | 92.25 | 92.01 | 90.08 | 92.01 | 90.08 | 92.01 | 90.08 | 92.01 | 90.08 |
|            | Cmin 24 ≤ 2.5 mg/L (%) | 70.44 | 64.62 | 64.62 | 64.62 | 64.62 | 64.62 | 64.62 | 64.62 | 64.62 | 64.62 | 64.62 | 64.62 |
|            | Cmin 48 ≤ 2.5 mg/L (%) | 94.47 | 94.47 | 94.47 | 94.47 | 94.47 | 94.47 | 94.47 | 94.47 | 92.99 | 94.47 | 92.99 | 94.47 |
| <b>100</b> | Optimal dose (g)       | 0.9   | 1.05  | 0.9   | 1.05  | 0.95  | 1.05  | 1     | 1.1   | 1.05  | 1.1   | 1.05  | 1.1   |
|            | Target attainment (%)  | 92.01 | 92.25 | 92.01 | 90.08 | 92.01 | 90.08 | 92.01 | 92.25 | 92.01 | 92.25 | 92.01 | 90.08 |

|            |                        |       |       |       |       |       |       |       |       |       |       |       |       |
|------------|------------------------|-------|-------|-------|-------|-------|-------|-------|-------|-------|-------|-------|-------|
|            | Cmin 24 ≤ 2.5 mg/L (%) | 70.44 | 70.44 | 70.44 | 64.62 | 70.44 | 64.62 | 64.62 | 64.62 | 64.62 | 64.62 | 64.62 | 64.62 |
|            | Cmin 48 ≤ 2.5 mg/L (%) | 96.83 | 94.47 | 96.83 | 94.47 | 94.47 | 94.47 | 94.47 | 94.47 | 94.47 | 94.47 | 94.47 | 94.47 |
| <b>110</b> | Optimal dose (g)       | 0.9   | 1.15  | 0.95  | 1.15  | 0.95  | 1.15  | 1     | 1.15  | 1.05  | 1.15  | 1.1   | 1.15  |
|            | Target attainment (%)  | 92.01 | 92.25 | 93.28 | 92.25 | 92.01 | 92.25 | 92.01 | 92.25 | 92.01 | 90.08 | 92.01 | 90.08 |
|            | Cmin 24 ≤ 2.5 mg/L (%) | 78.44 | 70.44 | 74.41 | 70.44 | 74.41 | 70.44 | 70.44 | 64.62 | 70.44 | 64.62 | 64.62 | 64.62 |
|            | Cmin 48 ≤ 2.5 mg/L (%) | 96.83 | 94.47 | 96.83 | 94.47 | 96.83 | 94.47 | 96.83 | 94.47 | 96.83 | 94.47 | 94.47 | 94.47 |
| <b>120</b> | Optimal dose (g)       | 0.9   | 1.2   | 0.95  | 1.2   | 0.95  | 1.25  | 1     | 1.25  | 1.05  | 1.25  | 1.1   | 1.25  |
|            | Target attainment (%)  | 92.01 | 92.25 | 92.01 | 92.25 | 92.01 | 92.25 | 92.01 | 92.25 | 92.01 | 92.25 | 92.01 | 92.25 |
|            | Cmin 24 ≤ 2.5 mg/L (%) | 83.68 | 74.41 | 81.15 | 74.41 | 78.44 | 70.44 | 76.09 | 70.44 | 74.41 | 70.44 | 70.44 | 64.62 |
|            | Cmin 48 ≤ 2.5 mg/L (%) | 96.83 | 96.83 | 96.83 | 96.83 | 96.83 | 96.83 | 96.83 | 96.83 | 96.83 | 94.47 | 96.83 | 94.47 |
| <b>130</b> | Optimal dose (g)       | 0.9   | 1.3   | 0.95  | 1.3   | 1     | 1.3   | 1     | 1.3   | 1.05  | 1.3   | 1.1   | 1.3   |
|            | Target attainment (%)  | 92.01 | 92.25 | 92.01 | 92.25 | 92.01 | 92.25 | 92.01 | 92.25 | 92.01 | 92.25 | 92.01 | 92.25 |
|            | Cmin 24 ≤ 2.5 mg/L (%) | 92.07 | 77.08 | 83.68 | 76.09 | 81.15 | 74.41 | 81.15 | 70.44 | 77.08 | 70.44 | 74.41 | 70.44 |
|            | Cmin 48 ≤ 2.5 mg/L (%) | 99.28 | 96.83 | 96.83 | 96.83 | 96.83 | 96.83 | 96.83 | 96.83 | 96.83 | 96.83 | 96.83 | 96.83 |
| <b>140</b> | Optimal dose (g)       | 0.9   | 1.35  | 0.95  | 1.4   | 1     | 1.4   | 1.05  | 1.4   | 1.05  | 1.4   | 1.1   | 1.4   |
|            | Target attainment (%)  | 92.01 | 92.25 | 92.01 | 92.25 | 92.01 | 92.25 | 93.28 | 92.25 | 92.01 | 92.25 | 92.01 | 92.25 |
|            | Cmin 24 ≤ 2.5 mg/L (%) | 92.07 | 78.44 | 92.07 | 77.08 | 83.68 | 76.09 | 81.15 | 74.41 | 81.15 | 74.41 | 77.08 | 70.44 |
|            | Cmin 48 ≤ 2.5 mg/L (%) | 100   | 96.83 | 99.28 | 96.83 | 96.83 | 96.83 | 96.83 | 96.83 | 96.83 | 96.83 | 96.83 | 96.83 |
| <b>150</b> | Optimal dose (g)       | 0.9   | 1.45  | 0.95  | 1.45  | 1     | 1.45  | 1.05  | 1.45  | 1.05  | 1.45  | 1.1   | 1.45  |
|            | Target attainment (%)  | 92.01 | 92.25 | 92.01 | 92.25 | 92.01 | 92.25 | 92.01 | 92.25 | 92.01 | 92.25 | 92.01 | 92.25 |
|            | Cmin 24 ≤ 2.5 mg/L (%) | 94.47 | 78.44 | 93.56 | 78.44 | 92.07 | 78.44 | 83.68 | 77.08 | 83.68 | 76.09 | 81.15 | 74.41 |
|            | Cmin 48 ≤ 2.5 mg/L (%) | 100   | 96.83 | 100   | 96.83 | 100   | 96.83 | 99.28 | 96.83 | 96.83 | 96.83 | 96.83 | 96.83 |
| <b>160</b> | Optimal dose (g)       | 0.95  | 1.5   | 0.95  | 1.5   | 1     | 1.55  | 1.05  | 1.55  | 1.1   | 1.55  | 1.1   | 1.55  |

|            |                        |       |       |       |       |       |       |       |       |       |       |       |       |
|------------|------------------------|-------|-------|-------|-------|-------|-------|-------|-------|-------|-------|-------|-------|
|            | Target attainment (%)  | 93.28 | 92.25 | 92.01 | 92.25 | 92.01 | 92.25 | 92.01 | 92.25 | 93.28 | 92.25 | 92.01 | 92.25 |
|            | Cmin 24 ≤ 2.5 mg/L (%) | 94.47 | 83.68 | 94.47 | 78.44 | 93.56 | 78.44 | 92.07 | 78.44 | 87.99 | 77.08 | 83.68 | 76.09 |
|            | Cmin 48 ≤ 2.5 mg/L (%) | 100   | 96.83 | 100   | 96.83 | 100   | 96.83 | 100   | 96.83 | 99.28 | 96.83 | 99.28 | 96.83 |
| <b>170</b> | Optimal dose (g)       | 0.95  | 1.6   | 0.95  | 1.6   | 1     | 1.6   | 1.05  | 1.6   | 1.1   | 1.6   | 1.1   | 1.6   |
|            | Target attainment (%)  | 93.28 | 92.25 | 92.01 | 92.25 | 92.01 | 92.25 | 92.01 | 92.25 | 92.01 | 92.25 | 92.01 | 92.25 |
|            | Cmin 24 ≤ 2.5 mg/L (%) | 94.47 | 83.68 | 94.47 | 83.68 | 94.47 | 78.44 | 93.56 | 78.44 | 92.07 | 78.44 | 92.07 | 77.08 |
|            | Cmin 48 ≤ 2.5 mg/L (%) | 100   | 96.83 | 100   | 96.83 | 100   | 96.83 | 100   | 96.83 | 100   | 96.83 | 100   | 96.83 |
| <b>180</b> | Optimal dose (g)       | 0.95  | 1.65  | 1     | 1.65  | 1     | 1.65  | 1.05  | 1.7   | 1.1   | 1.7   | 1.15  | 1.7   |
|            | Target attainment (%)  | 93.28 | 92.25 | 93.28 | 92.25 | 92.01 | 92.25 | 92.01 | 92.25 | 92.01 | 92.25 | 93.28 | 92.25 |
|            | Cmin 24 ≤ 2.5 mg/L (%) | 96.83 | 89.62 | 94.47 | 87.99 | 94.47 | 83.68 | 94.47 | 78.44 | 93.56 | 78.44 | 93.56 | 78.44 |
|            | Cmin 48 ≤ 2.5 mg/L (%) | 100   | 96.83 | 100   | 96.83 | 100   | 96.83 | 100   | 96.83 | 100   | 96.83 | 100   | 96.83 |
| <b>190</b> | Optimal dose (g)       | 0.95  | 1.75  | 1     | 1.75  | 1.05  | 1.75  | 1.05  | 1.75  | 1.1   | 1.75  | 1.15  | 1.75  |
|            | Target attainment (%)  | 93.28 | 92.25 | 93.28 | 92.25 | 93.28 | 92.25 | 92.01 | 92.25 | 92.01 | 92.25 | 92.01 | 92.25 |
|            | Cmin 24 ≤ 2.5 mg/L (%) | 96.83 | 92.07 | 96.83 | 89.62 | 94.47 | 87.99 | 94.47 | 83.68 | 94.47 | 78.44 | 93.56 | 78.44 |
|            | Cmin 48 ≤ 2.5 mg/L (%) | 100   | 96.83 | 100   | 96.83 | 100   | 96.83 | 100   | 96.83 | 100   | 96.83 | 100   | 96.83 |
| <b>200</b> | Optimal dose (g)       | 0.95  | 1.8   | 1     | 1.8   | 1.05  | 1.8   | 1.05  | 1.8   | 1.1   | 1.8   | 1.15  | 1.85  |
|            | Target attainment (%)  | 93.28 | 92.25 | 93.28 | 92.25 | 93.28 | 92.25 | 92.01 | 92.25 | 92.01 | 92.25 | 92.01 | 92.25 |
|            | Cmin 24 ≤ 2.5 mg/L (%) | 96.83 | 92.07 | 96.83 | 92.07 | 96.83 | 89.62 | 96.83 | 87.99 | 94.47 | 83.68 | 94.47 | 78.44 |
|            | Cmin 48 ≤ 2.5 mg/L (%) | 100   | 99.28 | 100   | 99.28 | 100   | 96.83 | 100   | 96.83 | 100   | 96.83 | 100   | 96.83 |
| <b>210</b> | Optimal dose (g)       | 0.95  | 1.9   | 1     | 1.9   | 1.05  | 1.9   | 1.1   | 1.9   | 1.1   | 1.9   | 1.15  | 1.9   |
|            | Target attainment (%)  | 92.01 | 92.25 | 93.28 | 92.25 | 93.28 | 92.25 | 93.28 | 92.25 | 92.01 | 92.25 | 92.01 | 92.25 |
|            | Cmin 24 ≤ 2.5 mg/L (%) | 96.83 | 92.07 | 96.83 | 92.07 | 96.83 | 92.07 | 96.83 | 89.62 | 96.83 | 87.99 | 94.47 | 80.97 |
|            | Cmin 48 ≤ 2.5 mg/L (%) | 100   | 99.28 | 100   | 99.28 | 100   | 99.28 | 100   | 96.83 | 100   | 96.83 | 100   | 96.83 |

|            |                        |       |       |       |       |       |       |       |       |       |       |       |       |
|------------|------------------------|-------|-------|-------|-------|-------|-------|-------|-------|-------|-------|-------|-------|
| <b>220</b> | Optimal dose (g)       | 0.95  | 1.95  | 1     | 1.95  | 1.05  | 1.95  | 1.1   | 1.95  | 1.1   | 1.95  | 1.15  | 1.95  |
|            | Target attainment (%)  | 92.01 | 92.25 | 93.28 | 92.25 | 93.28 | 92.25 | 93.28 | 92.25 | 92.01 | 92.25 | 92.01 | 92.25 |
|            | Cmin 24 ≤ 2.5 mg/L (%) | 96.83 | 93.56 | 96.83 | 93.56 | 96.83 | 93.56 | 96.83 | 92.07 | 96.83 | 89.62 | 96.83 | 87.99 |
|            | Cmin 48 ≤ 2.5 mg/L (%) | 100   | 100   | 100   | 100   | 100   | 99.28 | 100   | 99.28 | 100   | 99.28 | 100   | 96.83 |
| <b>230</b> | Optimal dose (g)       | 1     | 2     | 1     | 2     | 1.05  | 2.05  | 1.1   | 2.05  | 1.15  | 2.05  | 1.15  | 2.05  |
|            | Target attainment (%)  | 93.28 | 92.25 | 92.01 | 92.25 | 93.28 | 92.25 | 93.28 | 92.25 | 93.28 | 92.25 | 92.01 | 92.25 |
|            | Cmin 24 ≤ 2.5 mg/L (%) | 96.83 | 93.56 | 96.83 | 93.56 | 96.83 | 93.56 | 96.83 | 93.56 | 96.83 | 89.62 | 96.83 | 89.62 |
|            | Cmin 48 ≤ 2.5 mg/L (%) | 100   | 100   | 100   | 100   | 100   | 100   | 100   | 100   | 100   | 99.28 | 100   | 99.28 |
| <b>240</b> | Optimal dose (g)       | 1     | 2.1   | 1.05  | 2.1   | 1.05  | 2.1   | 1.1   | 2.1   | 1.15  | 2.1   | 1.2   | 2.1   |
|            | Target attainment (%)  | 93.28 | 92.25 | 93.28 | 92.25 | 92.01 | 92.25 | 93.28 | 92.25 | 93.28 | 92.25 | 93.28 | 92.25 |
|            | Cmin 24 ≤ 2.5 mg/L (%) | 96.83 | 93.56 | 96.83 | 93.56 | 96.83 | 93.56 | 96.83 | 93.56 | 96.83 | 93.56 | 96.83 | 91.1  |
|            | Cmin 48 ≤ 2.5 mg/L (%) | 100   | 100   | 100   | 100   | 100   | 100   | 100   | 100   | 100   | 100   | 100   | 100   |
| <b>250</b> | Optimal dose (g)       | 1     | 2.15  | 1.05  | 2.15  | 1.05  | 2.15  | 1.1   | 2.15  | 1.15  | 2.15  | 1.2   | 2.15  |
|            | Target attainment (%)  | 93.28 | 92.25 | 93.28 | 92.25 | 92.01 | 92.25 | 93.28 | 92.25 | 93.28 | 92.25 | 93.28 | 92.25 |
|            | Cmin 24 ≤ 2.5 mg/L (%) | 96.83 | 94.47 | 96.83 | 93.56 | 96.83 | 93.56 | 96.83 | 93.56 | 96.83 | 93.56 | 96.83 | 93.56 |
|            | Cmin 48 ≤ 2.5 mg/L (%) | 100   | 100   | 100   | 100   | 100   | 100   | 100   | 100   | 100   | 100   | 100   | 100   |
